# Supplementary material for: Transcriptional Responses of Resistant and Susceptible Fish Clones to the Bacterial Pathogen Flavobacterium psychrophilum
Source: PLoS One. 2012 Jun 13;7(6):e39126. doi: 10.1371/journal.pone.0039126 (PMC3374740; doi:10.1371/journal.pone.0039126)
Supplement: Figure S3 — This table contains the list of genes differentially expressed between the two fish clonal lines prior infection. GO categories were identified for the whole set of probes. (XLSX) [file pone.0039126.s003.xlsx]

## Sheet: S. ctrl vs R. ctrl with GO
Suppl Figure 3. Genes differentially expressed between susceptible (B57_s) and resistant (A3_r) control fish.
This table contains the list of genes differentially expressed between the two fish clonal lines
prior infection. GO categories were identified for the whole set of probes.
Spot ID	Adj. pValue	Fold (B57_s/A3_r)	Name (EST)	Best hit accession	GO1	GO2
TC129849	0.000115958	10.5264	CA359866,s,om,10	IGG2B_MOUSE	0	GO:0005576;extracellular region;GO:0016021;integral to membrane;GO:0005886;plasma membrane
TC110454	7.90398e-05	4.25592	CA352311,s,om,10	EF2_CALJA	0	GO:0005737;cytoplasm
TC104232	9.35354e-05	0.319468	AY870265,s,om,10	IGHM_HUMAN	0	GO:0016021;integral to membrane;GO:0005624;membrane fraction
TC99389	3.6412e-10	0.0444186	BX303871,s,om,10	CMAH_DANRE	dre:100334513;dre:431739	GO:0022900;electron transport chain;GO:0006810;transport
TC119181	3.19899e-08	7.69808	BX882619,s,om,10	RM17_MOUSE	GO:0000002;mitochondrial genome maintenance;GO:0006412;translation	GO:0005743;mitochondrial inner membrane;GO:0005840;ribosome
TC98088	2.56202e-07	5.17945	BX299969,s,om,10	RM17_MOUSE	GO:0000002;mitochondrial genome maintenance;GO:0006412;translation	GO:0005743;mitochondrial inner membrane;GO:0005840;ribosome
TC103068	4.91495e-06	3.27731	CA384409,s,om,10	CCYL1_DANRE	GO:0000079;regulation of cyclin-dependent protein kinase activity	0
TC118948	6.04483e-05	3.11585	CX035059,s,om,10	TPD53_CHICK	GO:0000086;G2/M transition of mitotic cell cycle	GO:0005769;early endosome;GO:0048471;perinuclear region of cytoplasm
TC121183	3.35703e-06	0.315261	CA343821,s,om,10	GCNT7_PIG	GO:0000139;Golgi membrane;GO:0016021;integral to membrane	0
TC109819	3.81046e-09	0.058495	CA353708,s,om,10	RS8_RAT	GO:0000462;maturation of SSU-rRNA from tricistronic rRNA transcript (SSU-rRNA, 5.8S rRNA, LSU-rRNA);GO:0006414;translational elongation	GO:0022627;cytosolic small ribosomal subunit
TC101526	2.62932e-08	0.0803839	BX297550,s,om,10	SHRM1_XENLA	GO:0000902;cell morphogenesis	GO:0016324;apical plasma membrane;GO:0016327;apicolateral plasma membrane;GO:0005737;cytoplasm;GO:0005874;microtubule
TC127393	2.07116e-06	0.151305	CX030309,s,om,10	DDX6_MOUSE	GO:0000932;cytoplasmic mRNA processing body	0
TC128968	0.000242604	4.02167	CA368299,s,om,10	CASP8_MOUSE	GO:0001525;angiogenesis;GO:0006915;apoptosis;GO:0007507;heart development;GO:0030225;macrophage differentiation;GO:0001841;neural tube formation;GO:0042981;regulation of apoptosis	GO:0005739;mitochondrion;GO:0030690;Noc1p-Noc2p complex
TC103120	0.000406814	3.20326	BX865679,s,om,10	VGFR3_DANRE	GO:0001525;angiogenesis;GO:0030154;cell differentiation;GO:0001945;lymph vessel development;GO:0006468;protein phosphorylation;GO:0035474;selective angioblast sprouting;GO:0060841;venous blood vessel development	GO:0005887;integral to plasma membrane
TC95167	0.000202768	3.35688	CA375648,s,om,10	JUN_MOUSE	GO:0001525;angiogenesis;GO:0031103;axon regeneration;GO:0071277;cellular response to calcium ion;GO:0035026;leading edge cell differentiation;GO:0001889;liver development;GO:0001774;microglial cell activation;GO:0008285;negative regulation of cell proliferation;GO:0043524;negative regulation of neuron apoptosis;GO:0031953;negative regulation of protein autophosphorylation;GO:0003151;outflow tract…	GO:0005667;transcription factor complex;GO:0017053;transcriptional repressor complex
TC102751	0.000633177	3.09796	CA348470,s,om,10	NM_001126463,1	GO:0001558;regulation of cell growth,GO:0040008;regulation of growth	GO:0005576;extracellular region
TC128446	8.86517e-08	0.133547	CU073225,s,om,10	CO1A1_MOUSE	GO:0001568;blood vessel development;GO:0060346;bone trabecula formation;GO:0060351;cartilage development involved in endochondral bone morphogenesis;GO:0071230;cellular response to amino acid stimulus;GO:0001958;endochondral ossification;GO:0060325;face morphogenesis;GO:0001957;intramembranous ossification;GO:0010812;negative regulation of cell-substrate adhesion;GO:0001649;osteoblast differentia…	GO:0005584;collagen type I;GO:0005737;cytoplasm
TC130795	2.76581e-07	5.10641	BX297418,s,om,10	B4GN1_MOUSE	GO:0001574;ganglioside biosynthetic process;GO:0030259;lipid glycosylation;GO:0019915;lipid storage;GO:0007283;spermatogenesis	GO:0030173;integral to Golgi membrane
TC103448	9.61686e-06	3.06343	BX313743,s,om,10	PVRL2_MOUSE	GO:0001675;acrosome assembly;GO:0032990;cell part morphogenesis;GO:0007010;cytoskeleton organization;GO:0051654;establishment of mitochondrion localization;GO:0009566;fertilization;GO:0043064;flagellum organization;GO:0007156;homophilic cell adhesion;GO:0030382;sperm mitochondrion organization;GO:0007289;spermatid nucleus differentiation	GO:0016021;integral to membrane;GO:0005915;zonula adherens
TC122087	7.22955e-08	6.1964	CX259825,s,om,10	NM_001123699,1	GO:0002474;antigen processing and presentation of peptide antigen via MHC class I,GO:0006955;immune response,GO:0019882;antigen processing and presentation,GO:0048002;antigen processing and presentation of peptide antigen	GO:0005886;plasma membrane,GO:0042611;MHC protein complex,GO:0042612;MHC class I protein complex,GO:0044459;plasma membrane part
TC94989	4.70629e-06	0.151216	CX039844,s,om,10	NM_001123699,1	GO:0002474;antigen processing and presentation of peptide antigen via MHC class I,GO:0006955;immune response,GO:0019882;antigen processing and presentation,GO:0048002;antigen processing and presentation of peptide antigen	GO:0005886;plasma membrane,GO:0042611;MHC protein complex,GO:0042612;MHC class I protein complex,GO:0044459;plasma membrane part
TC100451	3.30241e-08	0.0679319	CX259899,s,om,10	B2MG_ICTPU	GO:0002474;antigen processing and presentation of peptide antigen via MHC class I;GO:0006955;immune response	GO:0005576;extracellular region;GO:0042612;MHC class I protein complex
TC94770	3.39471e-14	0.000645507	AF287486,s,om,10	HMR1_MOUSE	GO:0002474;antigen processing and presentation of peptide antigen via MHC class I;GO:0006955;immune response	GO:0005783;endoplasmic reticulum;GO:0016021;integral to membrane;GO:0042612;MHC class I protein complex
TC94740	5.50623e-13	872.561	AF287490,s,om,10	HA1B_BOVIN	GO:0002474;antigen processing and presentation of peptide antigen via MHC class I;GO:0006955;immune response	GO:0016021;integral to membrane;GO:0042612;MHC class I protein complex
TC94771	2.96811e-11	127.224	AB012064,s,om,10	HA1F_CHICK	GO:0002474;antigen processing and presentation of peptide antigen via MHC class I;GO:0006955;immune response	GO:0016021;integral to membrane;GO:0042612;MHC class I protein complex
TC94972	6.19509e-11	86.8552	AB012064,s,om,10	HA1F_CHICK	GO:0002474;antigen processing and presentation of peptide antigen via MHC class I;GO:0006955;immune response	GO:0016021;integral to membrane;GO:0042612;MHC class I protein complex
TC94781	1.08725e-08	11.5292	AF115525,s,om,10	HA1F_CHICK	GO:0002474;antigen processing and presentation of peptide antigen via MHC class I;GO:0006955;immune response	GO:0016021;integral to membrane;GO:0042612;MHC class I protein complex
TC94775	9.65844e-06	4.54096	AY523659,s,om,10	HA1A_BOVIN	GO:0002474;antigen processing and presentation of peptide antigen via MHC class I;GO:0006955;immune response	GO:0016021;integral to membrane;GO:0042612;MHC class I protein complex
TC94737	2.67278e-06	0.138028	AF287484,s,om,10	HA1B_RABIT	GO:0002474;antigen processing and presentation of peptide antigen via MHC class I;GO:0006955;immune response	GO:0016021;integral to membrane;GO:0042612;MHC class I protein complex
TC94738	1.02164e-08	0.0187866	AF115521,s,om,10	HA1F_CHICK	GO:0002474;antigen processing and presentation of peptide antigen via MHC class I;GO:0006955;immune response	GO:0016021;integral to membrane;GO:0042612;MHC class I protein complex
TC94778	2.50941e-12	0.00221795	AF287485,s,om,10	HA1F_CHICK	GO:0002474;antigen processing and presentation of peptide antigen via MHC class I;GO:0006955;immune response	GO:0016021;integral to membrane;GO:0042612;MHC class I protein complex
TC97715	2.50941e-12	0.00998673	AF115538,s,om,10	TAP2_HUMAN	GO:0002485;antigen processing and presentation of endogenous peptide antigen via MHC class I via ER pathway, TAP-dependent;GO:0002489;antigen processing and presentation of endogenous peptide antigen via MHC class Ib via ER pathway, TAP-dependent;GO:0002481;antigen processing and presentation of exogenous protein antigen via MHC class Ib, TAP-dependent;GO:0046967;cytosol to ER transport;GO:001906…	GO:0005634;nucleus;GO:0005886;plasma membrane;GO:0042825;TAP complex
TC114688	4.16782e-06	3.96188	CA367495,s,om,10	HB2K_MOUSE	GO:0002504;antigen processing and presentation of peptide or polysaccharide antigen via MHC class II;GO:0006955;immune response	GO:0016021;integral to membrane;GO:0042613;MHC class II protein complex
TC99217	2.5033e-07	7.26594	BX073772,s,om,10	OGG1_RAT	GO:0002526;acute inflammatory response;GO:0006284;base-excision repair;GO:0071276;cellular response to cadmium ion;GO:0006289;nucleotide-excision repair;GO:0033158;regulation of protein import into nucleus, translocation;GO:0006355;regulation of transcription, DNA-dependent;GO:0042493;response to drug;GO:0032355;response to estradiol stimulus;GO:0045471;response to ethanol;GO:0051593;response to …	GO:0005739;mitochondrion;GO:0016363;nuclear matrix;GO:0016607;nuclear speck
TC122355	3.02245e-07	0.200893	BX304977,s,om,10	NM_001123685,1	GO:0005513;detection of calcium ion,GO:0007166;cell surface receptor linked signal transduction,GO:0007186;G-protein coupled receptor protein signaling pathway,GO:0007242;intracellular signaling cascade,GO:0009593;detection of chemical stimulus,GO:0010035;response to inorganic substance,GO:0010038;response to metal ion,GO:0019722;calcium-mediated signaling,GO:0019932;second-messenger-mediated sig…	GO:0005886;plasma membrane,GO:0016021;integral to membrane,GO:0031224;intrinsic to membrane
TC112510	4.8307e-06	16.298	CR370063,s,om,10	CJ058_HUMAN	GO:0005576;extracellular region	0
TC106901	8.23061e-08	7.37105	CX140490,s,om,10	CC126_HUMAN	GO:0005576;extracellular region	0
TC108488	7.1882e-07	7.36215	CA370333,s,om,10	MIA_BOVIN	GO:0005576;extracellular region	0
TC110578	8.90285e-06	4.90936	BX870184,s,om,10	MIA_BOVIN	GO:0005576;extracellular region	0
TC118631	2.09487e-06	4.38111	F3GS49K01E3FDS,s,om,10	MUA1_XENLA	GO:0005576;extracellular region	0
TC120051	0.00256423	3.82559	BX079809,s,om,10	NM_001124579,1	GO:0005576;extracellular region	0
TC105593	0.000788284	3.30792	BX077241,s,om,10	RET4B_ONCMY	GO:0005576;extracellular region	0
TC98477	2.62364e-06	0.283433	BX300141,s,om,10	BOLA1_PONAB	GO:0005576;extracellular region	0
TC116751	0.000677077	0.272758	CA346792,s,om,10	HVM63_MOUSE	GO:0005576;extracellular region	0
TC131458	0.00253469	0.206441	CA345337,s,om,10	HVM63_MOUSE	GO:0005576;extracellular region	0
TC96854	0.000945961	0.187693	BX889053,s,om,10	HVM63_MOUSE	GO:0005576;extracellular region	0
TC121285	3.42619e-05	0.171714	CU067703,s,om,10	ENDD1_HUMAN	GO:0005576;extracellular region	0
TC123811	0.000156112	0.166488	DQ831724,s,om,10	HVM63_MOUSE	GO:0005576;extracellular region	0
TC125993	0.00148507	0.12497	BT074227,s,om,10	HVM63_MOUSE	GO:0005576;extracellular region	0
TC124687	0.00130748	0.123038	CA345337,s,om,10	HVM63_MOUSE	GO:0005576;extracellular region	0
TC115791	3.43508e-08	0.0981605	CA353400,s,om,10	AVR4_CHICK	GO:0005576;extracellular region	0
TC126596	4.74408e-05	0.0596989	CA372847,s,om,10	HVM63_MOUSE	GO:0005576;extracellular region	0
TC101227	1.32557e-09	0.0121294	BX302766,s,om,10	FEL_CYPCA	GO:0005576;extracellular region	0
TC112853	3.15939e-05	0.312851	BX302741,s,om,10	APOD_MOUSE	GO:0005576;extracellular region;GO:0005622;intracellular	0
TC130711	5.10104e-12	0.00515028	CX259561,s,om,10	CF015_PANTR	GO:0005578;proteinaceous extracellular matrix	0
TC99274	1.53143e-06	5.19092	CA357574,s,om,10	C1QL2_HUMAN	GO:0005581;collagen	0
TC103274	3.87224e-06	4.88988	BX312244,s,om,10	C1QL2_HUMAN	GO:0005581;collagen	0
TC98273	0.000113253	0.187651	CA379018,s,om,10	ANX2B_XENLA	GO:0005604;basement membrane	0
TC106334	0.0023058	8.54166	CA357558,s,om,10	FETUB_RAT	GO:0005615;extracellular space	0
TC117979	2.16451e-05	3.47603	CX254930,s,om,10	RSBN1_HUMAN	GO:0005634;nucleus	0
TC101914	6.15224e-05	3.0245	BX087082,s,om,10	FOXF1_DANRE	GO:0005634;nucleus	0
TC117236	0.000220285	0.268355	CX722037,s,om,10	FGF12_RAT	GO:0005634;nucleus	0
TC101058	0.00702903	4.00386	CA375711,s,om,10	HEBP1_XENLA	GO:0005737;cytoplasm	0
TC112876	5.40812e-05	0.295912	CA367734,s,om,10	TCTP_LABRO	GO:0005737;cytoplasm	0
TC106651	1.03737e-05	0.274889	CA367734,s,om,10	TCTP_LABRO	GO:0005737;cytoplasm	0
TC104799	1.9044e-07	0.216928	CA385047,s,om,10	CPI1_PIG	GO:0005737;cytoplasm	0
TC128491	9.07423e-12	0.0176429	CX720095,s,om,10	LPXN_MOUSE	GO:0005737;cytoplasm	0
TC109773	2.67525e-11	0.0162847	CX254003,s,om,10	SAMD9_HUMAN	GO:0005737;cytoplasm	0
TC103100	1.62081e-11	0.0126983	CX246411,s,om,10	TRI10_BOVIN	GO:0005737;cytoplasm	0
TC109005	4.92584e-07	0.174131	BX869597,s,om,10	UROL1_HUMAN	GO:0005737;cytoplasm;GO:0005576;extracellular region;GO:0016021;integral to membrane;GO:0005886;plasma membrane	0
TC110892	5.32463e-05	0.329128	BX305198,s,om,10	HARB1_DANRE	GO:0005737;cytoplasm;GO:0005634;nucleus	0
TC107984	9.28004e-06	0.307529	CX260451,s,om,10	TRI47_HUMAN	GO:0005737;cytoplasm;GO:0005634;nucleus	0
TC99018	2.37439e-05	0.277736	CA344857,s,om,10	NOSIP_DANRE	GO:0005737;cytoplasm;GO:0005634;nucleus	0
TC105617	4.01814e-05	5.86146	BX308016,s,om,10	WDHD1_XENLA	GO:0005737;cytoplasm;GO:0005654;nucleoplasm	0
TC103746	8.43763e-09	0.0599763	CA376932,s,om,10	ZPR1_BOVIN	GO:0005737;cytoplasm;GO:0005730;nucleolus	0
TC115351	7.78908e-09	18.1037	BX076542,s,om,10	TMUB1_DANRE	GO:0005737;cytoplasm;GO:0016021;integral to membrane;GO:0005634;nucleus	0
TC117144	1.38717e-08	8.53557	BX076542,s,om,10	TMUB1_DANRE	GO:0005737;cytoplasm;GO:0016021;integral to membrane;GO:0005634;nucleus	0
TC111518	2.57225e-09	18.1194	CA367308,s,om,10	LRIG2_HUMAN	GO:0005737;cytoplasm;GO:0016021;integral to membrane;GO:0005886;plasma membrane	0
TC104244	5.80425e-07	4.70372	CX124116,s,om,10	GLOD4_HUMAN	GO:0005739;mitochondrion	0
TC120986	2.19681e-05	3.56911	CA353802,s,om,10	ACO13_MOUSE	GO:0005739;mitochondrion	0
TC109461	4.49246e-05	3.17376	CU070263,s,om,10	SQRD_MOUSE	GO:0005739;mitochondrion	0
TC102855	5.54935e-05	0.275805	CX153158,s,om,10	ES1_HUMAN	GO:0005739;mitochondrion	0
TC126784	2.29305e-06	4.60566	CA385717,s,om,10	NM_001140233,1	GO:0005739;mitochondrion,GO:0005740;mitochondrial envelope,GO:0005743;mitochondrial inner membrane,GO:0016021;integral to membrane,GO:0019866;organelle inner membrane,GO:0031090;organelle membrane,GO:0031224;intrinsic to membrane,GO:0031966;mitochondrial membrane,GO:0031967;organelle envelope,GO:0031975;envelope,GO:0044429;mitochondrial part	0
TC106286	0.000244203	0.325148	CA364064,s,om,10	FABPH_BOVIN	GO:0005759;mitochondrial matrix	0
TC101791	2.64068e-07	5.82718	BX314324,s,om,10	NUD12_MOUSE	GO:0005777;peroxisome	0
TC97416	0.000208422	3.24691	CA369719,s,om,10	OXDD_PIG	GO:0005777;peroxisome	0
TC103842	1.29189e-10	51.2426	BX079072,s,om,10	SEP15_ONCMY	GO:0005788;endoplasmic reticulum lumen	0
TC94752	0.000140693	3.56257	AF059711,s,om,10	CP1A3_ONCMY	GO:0005789;endoplasmic reticulum membrane;GO:0005792;microsome	0
TC111619	2.25419e-10	0.0446695	CX245830,s,om,10	FA69B_XENTR	GO:0005789;endoplasmic reticulum membrane;GO:0016021;integral to membrane	0
TC122427	9.69829e-06	4.55814	CA354355,s,om,10	ENASE_DANRE	GO:0005829;cytosol	0
TC131200	0.00104222	3.02684	BX879762,s,om,10	HBB_COTGO	GO:0005833;hemoglobin complex	0
TC118396	4.21371e-10	22.8121	CA342541,s,om,10	EIF3F_PANTR	GO:0005852;eukaryotic translation initiation factor 3 complex	0
TC96299	3.43996e-05	0.326381	CA345846,s,om,10	FGGY_DANRE	GO:0005975;carbohydrate metabolic process	0
TC102389	7.23131e-10	26.104	BX073478,s,om,10	PGM2_MOUSE	GO:0006006;glucose metabolic process	GO:0005737;cytoplasm
TC124928	2.65904e-05	0.174379	CA376987,s,om,10	PGM1_MOUSE	GO:0006006;glucose metabolic process	GO:0005737;cytoplasm
TC103488	3.54201e-05	3.27144	CA368819,s,om,10	NM_001146601,1	GO:0006091;generation of precursor metabolites and energy,GO:0006119;oxidative phosphorylation,GO:0006163;purine nucleotide metabolic process,GO:0006164;purine nucleotide biosynthetic process,GO:0006754;ATP biosynthetic process,GO:0006793;phosphorus metabolic process,GO:0006796;phosphate metabolic process,GO:0006811;ion transport,GO:0006812;cation transport,GO:0006818;hydrogen transport,GO:000914…	GO:0016469;proton-transporting two-sector ATPase complex,GO:0033176;proton-transporting V-type ATPase complex,GO:0033177;proton-transporting two-sector ATPase complex,[ proton-transporting domain,GO:0033179;proton-transporting V-type ATPase,[ V0 domain
TC95624	0.000633411	3.70484	CA342135,s,om,10	ALDOB_SPAAU	GO:0006096;glycolysis	0
TC118867	3.25559e-06	0.238204	BX301756,s,om,10	LDHC_FUNHE	GO:0006096;glycolysis	GO:0005737;cytoplasm
TC101680	5.33098e-06	0.0749446	GB5RBPX01D1OVJ,s,om,10	G3PT_DANRE	GO:0006096;glycolysis	GO:0005737;cytoplasm
TC117895	2.01863e-06	5.93013	CA381494,s,om,10	ODPA_SMIMA	GO:0006096;glycolysis	GO:0005759;mitochondrial matrix
TC118329	1.77359e-05	0.310769	BX078988,s,om,10	TALDO_BOVIN	GO:0006098;pentose-phosphate shunt	GO:0005737;cytoplasm
TC96455	3.75772e-06	4.43211	BX316590,s,om,10	QCR9_BOVIN	GO:0006122;mitochondrial electron transport, ubiquinol to cytochrome c	GO:0005743;mitochondrial inner membrane;GO:0070469;respiratory chain
TC95880	2.95593e-06	3.86454	BX316590,s,om,10	QCR9_BOVIN	GO:0006122;mitochondrial electron transport, ubiquinol to cytochrome c	GO:0005743;mitochondrial inner membrane;GO:0070469;respiratory chain
TC116434	2.56202e-07	0.121578	CA357570,s,om,10	ADK_HUMAN	GO:0006144;purine base metabolic process;GO:0006166;purine ribonucleoside salvage	GO:0005829;cytosol
TC95833	0.000274128	3.3608	FYV3OTN01AVBKQ,s,om,10	AMPD2_MOUSE	GO:0006144;purine base metabolic process;GO:0009168;purine ribonucleoside monophosphate biosynthetic process	0
TC102447	6.43185e-05	0.311396	BX858927,s,om,10	ADA_XENTR	GO:0006154;adenosine catabolic process;GO:0046103;inosine biosynthetic process;GO:0009168;purine ribonucleoside monophosphate biosynthetic process	GO:0030054;cell junction;GO:0060205;cytoplasmic membrane-bounded vesicle lumen
TC119914	3.4377e-08	9.19505	DV197775,s,om,10	NM_001124458,1	GO:0006163;purine nucleotide metabolic process,GO:0006164;purine nucleotide biosynthetic process,GO:0006754;ATP biosynthetic process,GO:0006811;ion transport,GO:0006812;cation transport,GO:0009141;nucleoside triphosphate metabolic process,GO:0009142;nucleoside triphosphate biosynthetic process,GO:0009144;purine nucleoside triphosphate metabolic process,GO:0009145;purine nucleoside triphosphate bi…	GO:0016021;integral to membrane,GO:0031224;intrinsic to membrane
TC114553	7.33493e-07	5.76698	CA358298,s,om,10	ATPA_RAT	GO:0006172;ADP biosynthetic process;GO:0015991;ATP hydrolysis coupled proton transport;GO:0015986;ATP synthesis coupled proton transport	GO:0000275;mitochondrial proton-transporting ATP synthase complex, catalytic core F(1)
TC126001	2.94555e-05	0.19489	BX304768,s,om,10	MCM2_XENLA	GO:0006200;ATP catabolic process;GO:0007049;cell cycle;GO:0006268;DNA unwinding involved in replication;GO:0006270;DNA-dependent DNA replication initiation;GO:0030174;regulation of DNA-dependent DNA replication initiation	GO:0000785;chromatin;GO:0042555;MCM complex
TC129238	1.50316e-06	0.245682	CB488753,s,om,10	NM_001146472,1	GO:0006259;DNA metabolic process,GO:0006260;DNA replication,GO:0006278;RNA-dependent DNA replication	0
TC98097	0.00471951	0.325509	BX303775,s,om,10	KITH_HUMAN	GO:0006260;DNA replication;GO:0051289;protein homotetramerization;GO:0006206;pyrimidine base metabolic process;GO:0043097;pyrimidine nucleoside salvage	GO:0005829;cytosol
TC103830	4.45794e-05	3.15677	BX075730,s,om,10	UBE2A_MOUSE	GO:0006281;DNA repair;GO:0001701;in utero embryonic development;GO:0060135;maternal process involved in female pregnancy;GO:0070979;protein K11-linked ubiquitination;GO:0070936;protein K48-linked ubiquitination	GO:0001741;XY body
TC128288	4.18498e-06	0.254498	CA360622,s,om,10	UBE2A_MOUSE	GO:0006281;DNA repair;GO:0001701;in utero embryonic development;GO:0060135;maternal process involved in female pregnancy;GO:0070979;protein K11-linked ubiquitination;GO:0070936;protein K48-linked ubiquitination	GO:0001741;XY body
TC121482	1.0311e-08	42.1441	BX302737,s,om,10	DNSL3_RAT	GO:0006309;DNA fragmentation involved in apoptotic nuclear change	GO:0005634;nucleus
TC124570	1.30775e-05	6.1722	FYV3OTN01A0BNF,s,om,10	NSE2_HUMAN	GO:0006310;DNA recombination;GO:0006281;DNA repair	GO:0005634;nucleus
TC126286	0.000202173	8.10738	CA341933,s,om,10	H33_CHLRE	GO:0006334;nucleosome assembly	GO:0000786;nucleosome;GO:0005634;nucleus
TC121907	8.58017e-13	0.0117884	CX246877,s,om,10	PP1RA_PANTR	GO:0006351;transcription, DNA-dependent	GO:0000785;chromatin;GO:0005634;nucleus;GO:0072357;PTW/PP1 phosphatase complex
TC127237	1.55995e-06	4.18262	CX259194,s,om,10	CCD79_DANRE	GO:0006355;regulation of transcription, DNA-dependent	0
TC114582	8.63009e-08	5.94502	BX317003,s,om,10	CREM_CANFA	GO:0006355;regulation of transcription, DNA-dependent	GO:0005634;nucleus
TC106632	1.09427e-06	7.38746	BX869423,s,om,10	ZNF19_BOVIN	GO:0006355;regulation of transcription, DNA-dependent;GO:0006351;transcription, DNA-dependent	GO:0005634;nucleus
TC129934	4.12062e-05	0.316922	CX253513,s,om,10	ZN250_HUMAN	GO:0006355;regulation of transcription, DNA-dependent;GO:0006351;transcription, DNA-dependent	GO:0005634;nucleus
TC130877	0.000100754	0.301358	CA380047,s,om,10	ZNF17_HUMAN	GO:0006355;regulation of transcription, DNA-dependent;GO:0006351;transcription, DNA-dependent	GO:0005634;nucleus
TC107943	0.00472598	0.283038	CA354906,s,om,10	ZN544_HUMAN	GO:0006355;regulation of transcription, DNA-dependent;GO:0006351;transcription, DNA-dependent	GO:0005634;nucleus
TC111339	2.44426e-05	0.235472	CA354906,s,om,10	ZN544_HUMAN	GO:0006355;regulation of transcription, DNA-dependent;GO:0006351;transcription, DNA-dependent	GO:0005634;nucleus
TC121334	0.000370239	3.65859	CA356882,s,om,10	PHB2_RAT	GO:0006355;regulation of transcription, DNA-dependent;GO:0006351;transcription, DNA-dependent	GO:0005743;mitochondrial inner membrane;GO:0005634;nucleus
TC107480	0.000378555	3.66538	BX077231,s,om,10	CEBPD_HUMAN	GO:0006355;regulation of transcription, DNA-dependent;GO:0006366;transcription from RNA polymerase II promoter	GO:0005634;nucleus
TC121465	8.47941e-05	3.1701	CA355483,s,om,10	HSF2_MOUSE	GO:0006355;regulation of transcription, DNA-dependent;GO:0006950;response to stress;GO:0007283;spermatogenesis	GO:0005737;cytoplasm;GO:0005634;nucleus
TC112387	7.93862e-06	4.08533	BX081215,s,om,10	RPAC1_HUMAN	GO:0006363;termination of RNA polymerase I transcription;GO:0006362;transcription elongation from RNA polymerase I promoter;GO:0006361;transcription initiation from RNA polymerase I promoter	GO:0005736;DNA-directed RNA polymerase I complex;GO:0005654;nucleoplasm
TC114783	3.15939e-05	4.17567	BX860599,s,om,10	U3IP2_MOUSE	GO:0006364;rRNA processing	GO:0005730;nucleolus;GO:0030529;ribonucleoprotein complex
TC98991	9.21946e-06	3.46659	BX299653,s,om,10	PRP39_MOUSE	GO:0006397;mRNA processing;GO:0008380;RNA splicing	GO:0005634;nucleus
TC104867	9.99313e-05	3.10725	BX869426,s,om,10	NM_001141257,1	GO:0006399;tRNA metabolic process,GO:0006412;translation,GO:0006418;tRNA aminoacylation for protein translation,GO:0006437;tyrosyl-tRNA aminoacylation,GO:0034660;ncRNA metabolic process,GO:0043038;amino acid activation,GO:0043039;tRNA aminoacylation	0
TC105538	7.07757e-07	4.81115	BX085449,s,om,10	DD19B_HUMAN	GO:0006406;mRNA export from nucleus;GO:0015031;protein transport;GO:0055085;transmembrane transport	GO:0005737;cytoplasm;GO:0031965;nuclear membrane;GO:0005643;nuclear pore
TC127895	4.08943e-05	0.290921	CA351458,s,om,10	VWA1_BOVIN	GO:0006412;translation	GO:0005604;basement membrane;GO:0005840;ribosome
TC103370	1.92707e-05	0.153213	CA351458,s,om,10	VWA1_BOVIN	GO:0006412;translation	GO:0005604;basement membrane;GO:0005840;ribosome
TC124619	0.00197104	3.21059	CA358994,s,om,10	RT11_BOVIN	GO:0006412;translation	GO:0005763;mitochondrial small ribosomal subunit
TC115146	7.26881e-07	4.80508	T23112,s,om,10	RL6_RAT	GO:0006412;translation	GO:0005840;ribosome
TC119946	8.26743e-06	3.79158	CA350602,s,om,10	RS16_ICTPU	GO:0006412;translation	GO:0005840;ribosome
TC130236	4.47523e-05	0.277094	AJ312338,s,om,10	RL39_RAT	GO:0006412;translation	GO:0005840;ribosome
TC115780	1.92325e-05	0.230659	CA372079,s,om,10	RS21_ICTPU	GO:0006412;translation	GO:0005840;ribosome
TC122604	1.91012e-06	0.223218	CB492180,s,om,10	RL31_ICTPU	GO:0006412;translation	GO:0005840;ribosome
TC115064	2.63905e-06	0.213863	CB492180,s,om,10	RL31_ICTPU	GO:0006412;translation	GO:0005840;ribosome
TC104816	1.98495e-08	0.132385	CA346420,s,om,10	RS28_ICTPU	GO:0006412;translation	GO:0005840;ribosome
TC121481	1.45803e-08	0.0619473	FYV3OTN01DCVJI,s,om,10	RL14_MOUSE	GO:0006412;translation	GO:0005840;ribosome
TC126946	2.82292e-10	0.0717021	CX252784,s,om,10	NM_001124365,1	GO:0006412;translation	GO:0005840;ribosome,GO:0030529;ribonucleoprotein complex,GO:0043228;non-membrane-bounded organelle,GO:0043232;intracellular non-membrane-bounded organelle
TC120851	1.22078e-08	8.04628	CA345147,s,om,10	RL26_MOUSE	GO:0006412;translation	GO:0015934;large ribosomal subunit
TC101612	7.07908e-06	5.57741	CA387356,s,om,10	RM15_DANRE	GO:0006412;translation	GO:0015934;large ribosomal subunit;GO:0005739;mitochondrion
TC126896	2.97722e-09	17.1343	CA344641,s,om,10	RS2_ICTPU	GO:0006412;translation	GO:0015935;small ribosomal subunit
TC125641	1.95618e-08	16.2644	CA344641,s,om,10	RS2_ICTPU	GO:0006412;translation	GO:0015935;small ribosomal subunit
TC114376	3.02327e-09	11.9155	CX251886,s,om,10	NM_199591,2	GO:0006412;translation,GO:0006413;translational initiation	0
TC110850	5.89491e-07	7.20797	BX086993,s,om,10	NM_131491,2	GO:0006417;regulation of translation,GO:0010608;posttranscriptional regulation of gene expression,GO:0032268;regulation of cellular protein metabolic process	0
TC125276	6.45818e-06	4.4123	CA346155,s,om,10	CLPX_PONAB	GO:0006457;protein folding	0
TC98873	0.000131243	3.3858	BX297673,s,om,10	TCPQ_PONAB	GO:0006457;protein folding	GO:0005815;microtubule organizing center
TC118503	0.000465076	3.20006	BX887588,s,om,10	DJC27_DANRE	GO:0006457;protein folding;GO:0007264;small GTPase mediated signal transduction	0
TC118004	1.10757e-07	0.0949622	CA347005,s,om,10	PPIF_RAT	GO:0006457;protein folding;GO:0042981;regulation of apoptosis;GO:0046902;regulation of mitochondrial membrane permeability	GO:0005743;mitochondrial inner membrane;GO:0005759;mitochondrial matrix
TC106842	6.62635e-05	0.286269	BX306005,s,om,10	ATPF1_DANRE	GO:0006461;protein complex assembly	GO:0005739;mitochondrion
TC128840	3.17618e-10	31.0999	BX297152,s,om,10	VAMP8_RAT	GO:0006461;protein complex assembly;GO:0006906;vesicle fusion	GO:0012505;endomembrane system;GO:0016021;integral to membrane;GO:0031902;late endosome membrane;GO:0005765;lysosomal membrane;GO:0055037;recycling endosome;GO:0031201;SNARE complex
TC105418	7.44472e-07	0.245969	BX297152,s,om,10	VAMP8_RAT	GO:0006461;protein complex assembly;GO:0006906;vesicle fusion	GO:0012505;endomembrane system;GO:0016021;integral to membrane;GO:0031902;late endosome membrane;GO:0005765;lysosomal membrane;GO:0055037;recycling endosome;GO:0031201;SNARE complex
TC101414	4.0468e-07	0.125443	BX312976,s,om,10	NM_001140293,1	GO:0006468;protein amino acid phosphorylation,GO:0006793;phosphorus metabolic process,GO:0006796;phosphate metabolic process,GO:0016310;phosphorylation	0
TC129558	0.00014139	0.324232	CA342501,s,om,10	MLKL_HUMAN	GO:0006468;protein phosphorylation	0
TC128874	0.000102281	3.49965	BX313912,s,om,10	MK12_DANRE	GO:0006468;protein phosphorylation	GO:0005737;cytoplasm
TC110796	2.08964e-06	0.246866	BX319384,s,om,10	PACE1_MOUSE	GO:0006468;protein phosphorylation	GO:0005794;Golgi apparatus;GO:0030027;lamellipodium
TC105901	0.00183143	3.07536	BX914019,s,om,10	MYLK_CHICK	GO:0006468;protein phosphorylation	GO:0005829;cytosol;GO:0016020;membrane
TC115394	1.33195e-06	0.192304	CX717665,s,om,10	MPU1_HUMAN	GO:0006488;dolichol-linked oligosaccharide biosynthetic process;GO:0006457;protein folding	GO:0005789;endoplasmic reticulum membrane;GO:0016021;integral to membrane;GO:0005739;mitochondrion
TC115405	4.92584e-07	0.184886	CA351010,s,om,10	GPI8_MOUSE	GO:0006506;GPI anchor biosynthetic process;GO:0006508;proteolysis	GO:0042765;GPI-anchor transamidase complex
TC108771	0.00813848	0.263	CX256467,s,om,10	CAN1_BOVIN	GO:0006508;proteolysis	GO:0005737;cytoplasm;GO:0005886;plasma membrane
TC116370	6.00431e-06	0.278327	CA341790,s,om,10	LGMN_BOVIN	GO:0006508;proteolysis	GO:0005764;lysosome
TC101889	0.000257289	3.2629	CA351260,s,om,10	NM_001140120,1	GO:0006508;proteolysis,GO:0006631;fatty acid metabolic process,GO:0006633;fatty acid biosynthetic process,GO:0006636;unsaturated fatty acid biosynthetic process,GO:0006690;icosanoid metabolic process,GO:0006691;leukotriene metabolic process,GO:0008610;lipid biosynthetic process,GO:0016053;organic acid biosynthetic process,GO:0019370;leukotriene biosynthetic process,GO:0033559;unsaturated fatty ac…	0
TC116547	0.00021412	0.315297	F6VG15V02GUAS9,s,om,10	NM_001123535,1	GO:0006508;proteolysis,GO:0009057;macromolecule catabolic process,GO:0030163;protein catabolic process,GO:0044257;cellular protein catabolic process,GO:0044265;cellular macromolecule catabolic process,GO:0051603;proteolysis involved in cellular protein catabolic process	GO:0000502;proteasome complex,GO:0005829;cytosol,GO:0005839;proteasome core complex
TC94750	5.43573e-07	0.192086	AJ419570,s,om,10	DHE3_CHAAC	GO:0006520;cellular amino acid metabolic process	GO:0005759;mitochondrial matrix
TC110567	7.22044e-06	0.195163	BX086881,s,om,10	ASPG_DIRIM	GO:0006528;asparagine metabolic process	0
TC120767	1.34416e-08	0.140617	BX312657,s,om,10	GGH_HUMAN	GO:0006541;glutamine metabolic process	GO:0005615;extracellular space;GO:0005764;lysosome;GO:0042470;melanosome
TC99781	0.000105432	0.2353	BX310803,s,om,10	GUAA_HUMAN	GO:0006541;glutamine metabolic process;GO:0009113;purine base biosynthetic process	GO:0005829;cytosol
TC128301	5.74732e-05	3.02801	CA357743,s,om,10	AL4A1_DANRE	GO:0006561;proline biosynthetic process	GO:0005759;mitochondrial matrix
TC112631	1.22673e-05	3.33805	BX317583,s,om,10	ST1S3_DANRE	GO:0006584;catecholamine metabolic process;GO:0008202;steroid metabolic process;GO:0006805;xenobiotic metabolic process	GO:0005737;cytoplasm
TC116365	4.21849e-05	3.08744	CA385603,s,om,10	NM_213036,1	GO:0006605;protein targeting,GO:0006886;intracellular protein transport,GO:0008104;protein localization,GO:0015031;protein transport,GO:0034613;cellular protein localization,GO:0045184;establishment of protein localization,GO:0046907;intracellular transport,GO:0070727;cellular macromolecule localization	GO:0005739;mitochondrion,GO:0005740;mitochondrial envelope,GO:0005741;mitochondrial outer membrane,GO:0005742;mitochondrial outer membrane translocase complex,GO:0019867;outer membrane,GO:0031090;organelle membrane,GO:0031966;mitochondrial membrane,GO:0031967;organelle envelope,GO:0031968;organelle outer membrane,GO:0031975;envelope,GO:0044429;mitochondrial part,GO:0044455;mitochondrial membrane …
TC122288	4.82027e-05	0.316172	BX864524,s,om,10	ECHD2_MOUSE	GO:0006631;fatty acid metabolic process	GO:0005739;mitochondrion
TC125820	1.22763e-08	0.139407	CX026925,s,om,10	NM_001140116,1	GO:0006631;fatty acid metabolic process,GO:0006633;fatty acid biosynthetic process,GO:0008610;lipid biosynthetic process,GO:0016053;organic acid biosynthetic process,GO:0046394;carboxylic acid biosynthetic process,GO:0055114;oxidation reduction	GO:0005783;endoplasmic reticulum
TC117110	5.01795e-06	0.275672	CB493020,s,om,10	PECR_MOUSE	GO:0006633;fatty acid biosynthetic process	GO:0005739;mitochondrion;GO:0005777;peroxisome
TC125149	1.31382e-06	0.219386	BX298816,s,om,10	TPISA_DANRE	GO:0006633;fatty acid biosynthetic process;GO:0006094;gluconeogenesis;GO:0006096;glycolysis;GO:0006098;pentose-phosphate shunt	0
TC126619	4.75888e-06	4.34293	CA345195,s,om,10	ACOD_CYPCA	GO:0006633;fatty acid biosynthetic process;GO:0006950;response to stress	GO:0005789;endoplasmic reticulum membrane;GO:0016021;integral to membrane
TC97421	7.33429e-07	0.21322	BX857966,s,om,10	OXSM_MOUSE	GO:0006637;acyl-CoA metabolic process;GO:0051792;medium-chain fatty acid biosynthetic process;GO:0051790;short-chain fatty acid biosynthetic process	GO:0005739;mitochondrion
TC102103	6.90673e-06	0.226904	CX027739,s,om,10	SAP_BOVIN	GO:0006665;sphingolipid metabolic process	GO:0005764;lysosome
TC101769	1.03208e-06	0.115065	CA386169,s,om,10	SAP_BOVIN	GO:0006665;sphingolipid metabolic process	GO:0005764;lysosome
TC120670	0.000203123	3.05536	BX880238,s,om,10	ASAH1_HUMAN	GO:0006672;ceramide metabolic process	GO:0005764;lysosome
TC94967	1.92325e-05	5.63406	BX072663,s,om,10	CP17A_ONCMY	GO:0006694;steroid biosynthetic process	GO:0016020;membrane
TC128403	9.90596e-05	4.71668	CR371769,s,om,10	NM_001124202,1	GO:0006694;steroid biosynthetic process,GO:0006869;lipid transport,GO:0008202;steroid metabolic process,GO:0008610;lipid biosynthetic process,GO:0010876;lipid localization	GO:0005739;mitochondrion
TC94822	0.000768746	14.6844	AB117756,s,om,10	CAH1_CHIHA	GO:0006730;one-carbon metabolic process	GO:0005737;cytoplasm
TC112581	0.00168915	3.606	FYV3OTN01BA58N,s,om,10	ATP4A_XENLA	GO:0006754;ATP biosynthetic process	GO:0016021;integral to membrane
TC122522	6.5498e-08	0.167367	BX072631,s,om,10	AT2A1_MAKNI	GO:0006754;ATP biosynthetic process;GO:0045988;negative regulation of striated muscle contraction;GO:0031448;positive regulation of fast-twitch skeletal muscle fiber contraction	GO:0005789;endoplasmic reticulum membrane;GO:0005793;ER-Golgi intermediate compartment;GO:0031673;H zone;GO:0031674;I band;GO:0016021;integral to membrane;GO:0048471;perinuclear region of cytoplasm;GO:0016529;sarcoplasmic reticulum;GO:0033017;sarcoplasmic reticulum membrane
TC116540	2.31514e-06	0.254092	BX874254,s,om,10	HEM1_OPSTA	GO:0006783;heme biosynthetic process	GO:0005759;mitochondrial matrix
TC98252	6.83356e-06	3.25997	BX074038,s,om,10	SODC_XIPGL	GO:0006801;superoxide metabolic process	GO:0005737;cytoplasm
TC123735	3.3632e-05	3.25769	CA359149,s,om,10	NM_001124359,1	GO:0006809;nitric oxide biosynthetic process,GO:0044271;nitrogen compound biosynthetic process,GO:0046209;nitric oxide metabolic process,GO:0055114;oxidation reduction	0
TC131376	2.86516e-08	7.29904	CA347174,s,om,10	TMED1_XENTR	GO:0006810;transport	GO:0016021;integral to membrane;GO:0005886;plasma membrane
TC119396	1.2107e-08	0.0418551	BX301264,s,om,10	NM_001140204,1	GO:0006811;ion transport	GO:0016021;integral to membrane,GO:0031224;intrinsic to membrane
TC123572	2.86391e-06	7.14284	BX079197,s,om,10	NM_001139771,1	GO:0006811;ion transport,GO:0006812;cation transport,GO:0030001;metal ion transport	0
TC102210	1.41753e-07	0.0968154	CA362402,s,om,10	APOO_HUMAN	GO:0006869;lipid transport	GO:0034364;high-density lipoprotein particle;GO:0016021;integral to membrane;GO:0034362;low-density lipoprotein particle;GO:0034361;very-low-density lipoprotein particle
TC112609	7.15287e-10	0.0704972	BX073144,s,om,10	SPNS3_DANRE	GO:0006869;lipid transport;GO:0055085;transmembrane transport	GO:0016021;integral to membrane
TC125990	3.01799e-05	4.00036	BX871395,s,om,10	PLM_RAT	GO:0006874;cellular calcium ion homeostasis;GO:0006936;muscle contraction	GO:0034707;chloride channel complex
TC126276	4.43174e-08	8.77248	BX081111,s,om,10	NM_001140402,1	GO:0006887;exocytosis,GO:0006904;vesicle docking during exocytosis,GO:0016192;vesicle-mediated transport,GO:0022406;membrane docking,GO:0032940;secretion by cell,GO:0046903;secretion,GO:0048278;vesicle docking	0
TC104177	0.0041179	3.00833	BX860777,s,om,10	TFR1_CRIGR	GO:0006897;endocytosis;GO:0006508;proteolysis	GO:0016021;integral to membrane;GO:0042470;melanosome;GO:0005886;plasma membrane
TC123144	9.09409e-10	36.476	BX871949,s,om,10	CLC4M_GORGO	GO:0006897;endocytosis;GO:0045087;innate immune response	GO:0016021;integral to membrane
TC102927	5.77917e-06	4.0925	BX868636,s,om,10	CLC4M_HYLSY	GO:0006897;endocytosis;GO:0045087;innate immune response	GO:0016021;integral to membrane
TC95629	1.42302e-05	0.281666	BX082840,s,om,10	PDCD2_BOVIN	GO:0006915;apoptosis	GO:0005737;cytoplasm;GO:0005634;nucleus
TC102735	6.59704e-05	3.00074	CA374857,s,om,10	VDAC1_RABIT	GO:0006915;apoptosis	GO:0005741;mitochondrial outer membrane;GO:0005886;plasma membrane;GO:0046930;pore complex
TC128173	5.09321e-08	7.81003	CA360156,s,om,10	TRI39_RAT	GO:0006915;apoptosis	GO:0005829;cytosol;GO:0005739;mitochondrion
TC119441	4.50429e-06	0.212451	CX140945,s,om,10	CHIA_RAT	GO:0006915;apoptosis;GO:0006032;chitin catabolic process;GO:0090197;positive regulation of chemokine secretion;GO:0002532;production of molecular mediator involved in inflammatory response	GO:0005737;cytoplasm;GO:0005615;extracellular space
TC98848	2.7284e-05	0.327526	BX865809,s,om,10	CD11B_HUMAN	GO:0006915;apoptosis;GO:0008283;cell proliferation;GO:0007067;mitosis;GO:0006468;protein phosphorylation;GO:0001558;regulation of cell growth;GO:0050684;regulation of mRNA processing;GO:0006355;regulation of transcription, DNA-dependent	GO:0005737;cytoplasm;GO:0005634;nucleus
TC119464	6.48555e-06	0.271412	CA357619,s,om,10	GA45G_BOVIN	GO:0006915;apoptosis;GO:0030154;cell differentiation;GO:0007275;multicellular organismal development	0
TC118030	1.47794e-07	15.367	BX299959,s,om,10	SQSTM_RAT	GO:0006915;apoptosis;GO:0030154;cell differentiation;GO:0016236;macroautophagy;GO:0001934;positive regulation of protein phosphorylation;GO:0043122;regulation of I-kappaB kinase/NF-kappaB cascade	GO:0005770;late endosome;GO:0005634;nucleus
TC123406	1.95618e-08	0.0566352	BX085885,s,om,10	ITCH_MOUSE	GO:0006915;apoptosis;GO:0045087;innate immune response;GO:0046642;negative regulation of alpha-beta T cell proliferation;GO:0043066;negative regulation of apoptosis;GO:0050687;negative regulation of defense response to virus;GO:0046329;negative regulation of JNK cascade;GO:0032088;negative regulation of NF-kappaB transcription factor activity;GO:0045732;positive regulation of protein catabolic pr…	GO:0005938;cell cortex;GO:0031410;cytoplasmic vesicle;GO:0005624;membrane fraction;GO:0005634;nucleus;GO:0005886;plasma membrane
TC96494	4.04066e-05	0.305171	BX302061,s,om,10	NDK5_HUMAN	GO:0006916;anti-apoptosis;GO:0006241;CTP biosynthetic process;GO:0006183;GTP biosynthetic process;GO:0007275;multicellular organismal development;GO:0007286;spermatid development;GO:0006228;UTP biosynthetic process	0
TC105970	3.43508e-08	0.157385	BX876871,s,om,10	PPK4_SCHPO	GO:0006916;anti-apoptosis;GO:0006397;mRNA processing;GO:0006468;protein phosphorylation	GO:0005789;endoplasmic reticulum membrane;GO:0016021;integral to membrane
TC102836	2.02522e-06	0.228344	BX077955,s,om,10	BAX_MOUSE	GO:0006919;activation of caspase activity;GO:0008635;activation of caspase activity by cytochrome c;GO:0070059;apoptosis in response to endoplasmic reticulum stress;GO:0001783;B cell apoptosis;GO:0001782;B cell homeostasis;GO:0002358;B cell homeostatic proliferation;GO:0002352;B cell negative selection;GO:0001974;blood vessel remodeling;GO:0034644;cellular response to UV;GO:0021987;cerebral corte…	GO:0044445;cytosolic part;GO:0005783;endoplasmic reticulum;GO:0016021;integral to membrane;GO:0005741;mitochondrial outer membrane;GO:0005625;soluble fraction
TC109848	6.06244e-07	0.114707	CA353522,s,om,10	ARC1B_HUMAN	GO:0006928;cellular component movement;GO:0030833;regulation of actin filament polymerization	GO:0005885;Arp2/3 protein complex;GO:0005737;cytoplasm
TC119547	2.45949e-05	3.08099	CA343780,s,om,10	NM_001124467,2	GO:0006935;chemotaxis,GO:0007166;cell surface receptor linked signal transduction,GO:0007186;G-protein coupled receptor protein signaling pathway,GO:0007610;behavior,GO:0007626;locomotory behavior,GO:0042330;taxis	GO:0005886;plasma membrane,GO:0016021;integral to membrane,GO:0031224;intrinsic to membrane
TC104283	0.000454137	3.25024	CA364434,s,om,10	CYR61_PANTR	GO:0006935;chemotaxis;GO:0001558;regulation of cell growth	GO:0005576;extracellular region
TC95084	0.000968854	0.292352	AJ279069,s,om,10	IL8_CHICK	GO:0006935;chemotaxis;GO:0006955;immune response	GO:0005615;extracellular space
TC115195	1.08804e-07	0.119713	AY160981,s,om,10	IL8_CHICK	GO:0006935;chemotaxis;GO:0006955;immune response	GO:0005615;extracellular space
TC122706	2.9406e-07	0.0549459	CA364775,s,om,10	SGCA_HUMAN	GO:0006936;muscle contraction;GO:0007517;muscle organ development	GO:0005737;cytoplasm;GO:0005856;cytoskeleton;GO:0016021;integral to membrane;GO:0016012;sarcoglycan complex;GO:0042383;sarcolemma
TC104088	0.000278581	4.59591	CA375803,s,om,10	RYR1_HUMAN	GO:0006936;muscle contraction;GO:0051209;release of sequestered calcium ion into cytosol;GO:0031000;response to caffeine;GO:0001666;response to hypoxia	GO:0005938;cell cortex;GO:0031674;I band;GO:0005887;integral to plasma membrane;GO:0014701;junctional sarcoplasmic reticulum membrane;GO:0005790;smooth endoplasmic reticulum;GO:0014802;terminal cisterna
TC129460	0.00220329	3.21189	BX859133,s,om,10	HIG1A_MOUSE	GO:0006950;response to stress	GO:0016021;integral to membrane;GO:0005739;mitochondrion
TC120858	2.03096e-05	0.235957	BX321211,s,om,10	MEFV_HUMAN	GO:0006954;inflammatory response	GO:0005737;cytoplasm;GO:0005874;microtubule;GO:0005875;microtubule associated complex;GO:0005634;nucleus
TC121175	2.55662e-06	0.275238	CU073186,s,om,10	TLR13_MOUSE	GO:0006954;inflammatory response;GO:0045087;innate immune response	GO:0016021;integral to membrane
TC118607	2.80817e-06	4.47691	CA387236,s,om,10	NM_001124564,1	GO:0006955;immune response	0
TC102971	2.82207e-05	0.185963	CA386152,s,om,10	IGLL1_HUMAN	GO:0006955;immune response	GO:0005576;extracellular region;GO:0016020;membrane
TC118193	0.00113867	0.130228	FP323233,s,om,10	IGLL1_HUMAN	GO:0006955;immune response	GO:0005576;extracellular region;GO:0016020;membrane
TC131021	0.000484819	0.124525	CA351170,s,om,10	IGLL1_HUMAN	GO:0006955;immune response	GO:0005576;extracellular region;GO:0016020;membrane
TC126102	4.58693e-06	0.275246	CA357621,s,om,10	CO3_ONCMY	GO:0006957;complement activation, alternative pathway;GO:0006958;complement activation, classical pathway;GO:0006954;inflammatory response	GO:0005615;extracellular space
TC127101	1.06148e-07	0.124641	CT568671,s,om,10	CO3_ONCMY	GO:0006957;complement activation, alternative pathway;GO:0006958;complement activation, classical pathway;GO:0006954;inflammatory response	GO:0005615;extracellular space
TC95344	4.8209e-06	3.17003	BX864313,s,om,10	C4BPA_RAT	GO:0006958;complement activation, classical pathway;GO:0045087;innate immune response	GO:0005576;extracellular region
TC119095	0.000995237	0.284848	CX262267,s,om,10	KV118_HUMAN	GO:0006958;complement activation, classical pathway;GO:0045087;innate immune response	GO:0005576;extracellular region
TC114023	0.00169319	0.276406	CA368074,s,om,10	LV107_HUMAN	GO:0006958;complement activation, classical pathway;GO:0045087;innate immune response	GO:0005576;extracellular region
TC101890	0.00422086	0.146008	CA356084,s,om,10	KV404_HUMAN	GO:0006958;complement activation, classical pathway;GO:0045087;innate immune response	GO:0005576;extracellular region
TC102244	0.00123015	0.135855	CA355553,s,om,10	KV403_HUMAN	GO:0006958;complement activation, classical pathway;GO:0045087;innate immune response	GO:0005576;extracellular region
TC126368	0.00169627	0.135583	BX884903,s,om,10	KV404_HUMAN	GO:0006958;complement activation, classical pathway;GO:0045087;innate immune response	GO:0005576;extracellular region
TC107066	0.000133985	0.118074	CA355553,s,om,10	KV403_HUMAN	GO:0006958;complement activation, classical pathway;GO:0045087;innate immune response	GO:0005576;extracellular region
TC112977	0.000151192	0.0712548	CF752225,s,om,10	KV404_HUMAN	GO:0006958;complement activation, classical pathway;GO:0045087;innate immune response	GO:0005576;extracellular region
TC104464	4.78879e-05	3.39909	AJ620465,s,om,10	CR1_HUMAN	GO:0006958;complement activation, classical pathway;GO:0045087;innate immune response	GO:0005887;integral to plasma membrane
TC116979	1.31852e-05	0.283873	CA358411,s,om,10	ICEF1_HUMAN	GO:0006979;response to oxidative stress	GO:0005737;cytoplasm;GO:0005886;plasma membrane
TC96002	0.000111295	4.02376	BX307086,s,om,10	PDLI3_MOUSE	GO:0007015;actin filament organization;GO:0007507;heart development	GO:0015629;actin cytoskeleton;GO:0030018;Z disc
TC122899	2.01863e-06	0.290801	BX083703,s,om,10	TBCC_MOUSE	GO:0007023;post-chaperonin tubulin folding pathway	GO:0005737;cytoplasm;GO:0032391;photoreceptor connecting cilium
TC128636	2.92569e-06	3.20235	CA373781,s,om,10	S23IP_HUMAN	GO:0007030;Golgi organization;GO:0006886;intracellular protein transport	GO:0005783;endoplasmic reticulum;GO:0012507;ER to Golgi transport vesicle membrane;GO:0005793;ER-Golgi intermediate compartment
TC96538	0.000169317	3.72165	BX299023,s,om,10	UBP2_MOUSE	GO:0007049;cell cycle;GO:0007517;muscle organ development;GO:0000122;negative regulation of transcription from RNA polymerase II promoter;GO:0045931;positive regulation of mitotic cell cycle;GO:0016579;protein deubiquitination;GO:0050821;protein stabilization;GO:0006511;ubiquitin-dependent protein catabolic process	GO:0005938;cell cortex;GO:0005634;nucleus;GO:0048471;perinuclear region of cytoplasm
TC104558	3.26984e-07	6.17205	BX881955,s,om,10	GNAI3_CAVPO	GO:0007049;cell cycle;GO:0051301;cell division;GO:0007186;G-protein coupled receptor protein signaling pathway	GO:0005813;centrosome;GO:0030496;midbody;GO:0005886;plasma membrane
TC97387	3.13285e-06	0.317731	BX873692,s,om,10	DMC1_HUMAN	GO:0007131;reciprocal meiotic recombination	GO:0000794;condensed nuclear chromosome
TC97660	2.8617e-05	0.31204	BX312373,s,om,10	CF145_MOUSE	GO:0007154;cell communication	0
TC111345	0.000103497	0.29821	CX245427,s,om,10	CD22_HUMAN	GO:0007155;cell adhesion	0
TC111989	7.75323e-07	0.240301	F0DLFKL01CA79J,s,om,10	BGH3_PIG	GO:0007155;cell adhesion	GO:0005578;proteinaceous extracellular matrix
TC117519	3.71077e-06	4.23284	CA348566,s,om,10	CADM3_XENLA	GO:0007155;cell adhesion	GO:0016021;integral to membrane
TC108162	5.74278e-05	3.9227	CA348566,s,om,10	CADM3_XENLA	GO:0007155;cell adhesion	GO:0016021;integral to membrane
TC105848	0.000908648	0.220635	CA372307,s,om,10	C99L2_XENTR	GO:0007155;cell adhesion	GO:0030054;cell junction;GO:0016021;integral to membrane
TC128845	0.000305812	3.95897	CA362724,s,om,10	NM_146054,2	GO:0007155;cell adhesion,GO:0008360;regulation of cell shape,GO:0022604;regulation of cell morphogenesis,GO:0022610;biological adhesion	GO:0001725;stress fiber,GO:0005856;cytoskeleton,GO:0005884;actin filament,GO:0005886;plasma membrane,GO:0005912;adherens junction,GO:0005924;cell-substrate adherens junction,GO:0005925;focal adhesion,GO:0005938;cell cortex,GO:0015629;actin cytoskeleton,GO:0016323;basolateral plasma membrane,GO:0030054;cell junction,GO:0030055;cell-substrate junction,GO:0031941;filamentous actin,GO:0032432;actin f…
TC120969	9.40689e-05	0.270654	CA366114,s,om,10	POSTN_HUMAN	GO:0007155;cell adhesion;GO:0001501;skeletal system development	GO:0005578;proteinaceous extracellular matrix
TC102442	5.11535e-05	3.58775	BX298062,s,om,10	CD9_HUMAN	GO:0007155;cell adhesion;GO:0006928;cellular component movement;GO:0007342;fusion of sperm to egg plasma membrane;GO:0030913;paranodal junction assembly;GO:0030168;platelet activation;GO:0002576;platelet degranulation	GO:0005887;integral to plasma membrane;GO:0031092;platelet alpha granule membrane
TC105526	6.27231e-06	7.33098	CA346045,s,om,10	ALS_HUMAN	GO:0007155;cell adhesion;GO:0007165;signal transduction	GO:0005625;soluble fraction
TC112667	4.05559e-05	5.10442	CA387611,s,om,10	LAMA2_HUMAN	GO:0007155;cell adhesion;GO:0007517;muscle organ development;GO:0030155;regulation of cell adhesion;GO:0030334;regulation of cell migration;GO:0045995;regulation of embryonic development	GO:0005606;laminin-1 complex
TC130102	0.00128808	4.997	CR943196,s,om,10	CAD11_CHICK	GO:0007156;homophilic cell adhesion	GO:0016021;integral to membrane;GO:0005886;plasma membrane
TC126406	1.11665e-05	0.204699	AM418386,s,om,10	ITB2_PIG	GO:0007160;cell-matrix adhesion;GO:0007229;integrin-mediated signaling pathway;GO:0007275;multicellular organismal development	GO:0008305;integrin complex
TC125255	0.00231679	3.62241	BX305609,s,om,10	ARRD3_MOUSE	GO:0007165;signal transduction	GO:0005737;cytoplasm
TC116695	0.00828745	3.21312	BX305609,s,om,10	ARRD3_MOUSE	GO:0007165;signal transduction	GO:0005737;cytoplasm
TC97557	1.27061e-06	0.172809	CB497362,s,om,10	NM_001140422,1	GO:0007166;cell surface receptor linked signal transduction,GO:0007186;G-protein coupled receptor protein signaling pathway	GO:0005886;plasma membrane,GO:0016021;integral to membrane,GO:0031224;intrinsic to membrane
TC114463	7.83706e-05	3.60359	CA354856,s,om,10	NM_001140493,1	GO:0007166;cell surface receptor linked signal transduction,GO:0007186;G-protein coupled receptor protein signaling pathway	GO:0016021;integral to membrane,GO:0031224;intrinsic to membrane
TC114304	7.66656e-09	0.087472	CA357253,s,om,10	CD3D_BOVIN	GO:0007166;cell surface receptor linked signaling pathway	GO:0016021;integral to membrane
TC117401	0.000321218	0.282499	CX716947,s,om,10	COLI1_ONCMY	GO:0007218;neuropeptide signaling pathway	GO:0005576;extracellular region
TC107025	8.76825e-05	0.306769	BX300621,s,om,10	APH1B_DANRE	GO:0007219;Notch signaling pathway;GO:0043085;positive regulation of catalytic activity	GO:0016021;integral to membrane
TC98610	6.77241e-08	9.19387	BX881707,s,om,10	SYPL1_HUMAN	GO:0007268;synaptic transmission	GO:0030659;cytoplasmic vesicle membrane;GO:0005887;integral to plasma membrane;GO:0042470;melanosome;GO:0008021;synaptic vesicle
TC106416	7.27799e-05	0.210824	CX716437,s,om,10	DRXIB_SALSA	GO:0007275;multicellular organismal development	GO:0005576;extracellular region
TC102223	1.05693e-12	0.00310959	BX305636,s,om,10	DKK4_HUMAN	GO:0007275;multicellular organismal development;GO:0030178;negative regulation of Wnt receptor signaling pathway;GO:0016055;Wnt receptor signaling pathway	GO:0005576;extracellular region
TC120968	8.51594e-05	7.63467	CX246019,s,om,10	DEC13_DROME	GO:0007306;eggshell chorion assembly	GO:0042600;chorion;GO:0005576;extracellular region
TC124733	0.000304109	13.1788	CA350813,s,om,10	NCAM1_HUMAN	GO:0007411;axon guidance;GO:0060333;interferon-gamma-mediated signaling pathway	GO:0031225;anchored to membrane;GO:0005576;extracellular region;GO:0000139;Golgi membrane;GO:0016021;integral to membrane
TC120703	2.50783e-06	0.105205	BX076788,s,om,10	PTP10_DROME	GO:0007417;central nervous system development;GO:0008045;motor axon guidance;GO:0007424;open tracheal system development	GO:0045177;apical part of cell;GO:0030424;axon;GO:0016021;integral to membrane
TC105562	0.00031444	3.24964	BX298061,s,om,10	CD9_RAT	GO:0007420;brain development;GO:0007155;cell adhesion;GO:0006928;cellular component movement;GO:0007342;fusion of sperm to egg plasma membrane;GO:0014003;oligodendrocyte development;GO:0030913;paranodal junction assembly;GO:0009414;response to water deprivation	GO:0016324;apical plasma membrane;GO:0009986;cell surface;GO:0016021;integral to membrane
TC107610	0.000793905	3.13401	BX298061,s,om,10	CD9_RAT	GO:0007420;brain development;GO:0007155;cell adhesion;GO:0006928;cellular component movement;GO:0007342;fusion of sperm to egg plasma membrane;GO:0014003;oligodendrocyte development;GO:0030913;paranodal junction assembly;GO:0009414;response to water deprivation	GO:0016324;apical plasma membrane;GO:0009986;cell surface;GO:0016021;integral to membrane
TC101063	0.000883966	3.58613	BX081721,s,om,10	PCD18_HUMAN	GO:0007420;brain development;GO:0007156;homophilic cell adhesion	GO:0016021;integral to membrane;GO:0005886;plasma membrane
TC94896	0.00532052	3.45427	AB104415,s,om,10	DHI2_RAT	GO:0007565;female pregnancy;GO:0008211;glucocorticoid metabolic process;GO:0002017;regulation of blood volume by renal aldosterone;GO:0042493;response to drug;GO:0032094;response to food;GO:0051384;response to glucocorticoid stimulus;GO:0001666;response to hypoxia;GO:0032868;response to insulin stimulus	GO:0005783;endoplasmic reticulum;GO:0005792;microsome
TC97170	1.54634e-05	4.32873	BX867226,s,om,10	PGDH_MOUSE	GO:0007565;female pregnancy;GO:0045786;negative regulation of cell cycle;GO:0007567;parturition;GO:0006693;prostaglandin metabolic process;GO:0007179;transforming growth factor beta receptor signaling pathway	GO:0005737;cytoplasm
TC129760	0.00165806	3.40205	BX081555,s,om,10	KIF23_HUMAN	GO:0007596;blood coagulation;GO:0000910;cytokinesis;GO:0007018;microtubule-based movement;GO:0007067;mitosis;GO:0000022;mitotic spindle elongation	GO:0005829;cytosol;GO:0005871;kinesin complex;GO:0005874;microtubule;GO:0030496;midbody;GO:0005654;nucleoplasm;GO:0005819;spindle
TC107747	0.000289094	3.60636	BX301537,s,om,10	RGAP1_HUMAN	GO:0007596;blood coagulation;GO:0000915;cytokinesis, actomyosin contractile ring assembly;GO:0007108;cytokinesis, initiation of separation;GO:0009790;embryo development;GO:0007018;microtubule-based movement;GO:0007405;neuroblast proliferation;GO:0051056;regulation of small GTPase mediated signal transduction;GO:0007264;small GTPase mediated signal transduction;GO:0007283;spermatogenesis;GO:000827…	GO:0001669;acrosomal vesicle;GO:0005829;cytosol;GO:0005874;microtubule;GO:0030496;midbody;GO:0005634;nucleus;GO:0005819;spindle
TC119218	2.56372e-10	0.0431944	CU073943,s,om,10	HM20B_HUMAN	GO:0007596;blood coagulation;GO:0007049;cell cycle;GO:0016568;chromatin modification;GO:0006355;regulation of transcription, DNA-dependent	GO:0005694;chromosome;GO:0005654;nucleoplasm
TC115686	3.21214e-06	0.238324	CA379902,s,om,10	O2T29_HUMAN	GO:0007608;sensory perception of smell	GO:0016021;integral to membrane;GO:0005886;plasma membrane
TC100353	0.000665474	0.290268	CA344329,s,om,10	LAMP3_HUMAN	GO:0008283;cell proliferation	GO:0016021;integral to membrane;GO:0005765;lysosomal membrane
TC118723	4.14396e-07	10.4859	CA347514,s,om,10	TIG3_HUMAN	GO:0008285;negative regulation of cell proliferation	0
TC129624	2.4656e-07	9.10228	BX080001,s,om,10	GPNMB_HUMAN	GO:0008285;negative regulation of cell proliferation	GO:0042470;melanosome
TC112619	2.51971e-07	0.165088	BX317447,s,om,10	CASP7_HUMAN	GO:0008635;activation of caspase activity by cytochrome c;GO:0006921;cellular component disassembly involved in apoptosis;GO:0008629;induction of apoptosis by intracellular signals;GO:0006508;proteolysis	GO:0005829;cytosol;GO:0005789;endoplasmic reticulum membrane;GO:0031966;mitochondrial membrane;GO:0005654;nucleoplasm
TC131078	2.56372e-10	17.6414	CA352414,s,om,10	NM_001139825,1	GO:0008643;carbohydrate transport,GO:0008645;hexose transport,GO:0015749;monosaccharide transport,GO:0015761;mannose transport	GO:0000323;lytic vacuole,GO:0005773;vacuole,GO:0016021;integral to membrane,GO:0031224;intrinsic to membrane
TC98930	0.000100687	3.289	CA360751,s,om,10	OAT_HUMAN	GO:0008652;cellular amino acid biosynthetic process;GO:0007601;visual perception	GO:0005759;mitochondrial matrix
TC127889	0.000100687	3.03256	CA360751,s,om,10	OAT_HUMAN	GO:0008652;cellular amino acid biosynthetic process;GO:0007601;visual perception	GO:0005759;mitochondrial matrix
TC112760	0.000114483	3.76562	CA358914,s,om,10	BHMT1_DANRE	GO:0009086;methionine biosynthetic process	GO:0005737;cytoplasm
TC116247	0.00633968	3.19514	BX082716,s,om,10	5NT3_DANRE	GO:0009117;nucleotide metabolic process	0
TC131826	2.86935e-08	6.80262	CB489333,s,om,10	NM_001010842,1	GO:0009266;response to temperature stimulus,GO:0009408;response to heat,GO:0009628;response to abiotic stimulus	GO:0000267;cell fraction,GO:0005625;soluble fraction,GO:0048471;perinuclear region of cytoplasm
TC110708	1.35708e-05	4.13371	CA344226,s,om,10	AOC3_BOVIN	GO:0009308;amine metabolic process;GO:0007155;cell adhesion	GO:0009986;cell surface;GO:0016021;integral to membrane;GO:0005886;plasma membrane
TC104919	5.87296e-07	0.211247	CB494598,s,om,10	PDXK_SHEEP	GO:0009443;pyridoxal 5'-phosphate salvage	GO:0005737;cytoplasm
TC99861	1.60894e-05	0.210318	BX318724,s,om,10	STM_DANRE	GO:0009590;detection of gravity;GO:0043049;otic placode formation	GO:0005576;extracellular region
TC121651	5.17375e-05	0.198451	BX870942,s,om,10	IFI44_HUMAN	GO:0009615;response to virus	GO:0005737;cytoplasm
TC109973	0.000341053	5.90132	AB210816,s,om,10	NR5A2_HUMAN	GO:0009790;embryo development;GO:0045070;positive regulation of viral genome replication;GO:0034339;regulation of transcription from RNA polymerase II promoter by nuclear hormone receptor	GO:0005737;cytoplasm;GO:0005654;nucleoplasm
TC102217	0.000213124	0.321695	CU073761,s,om,10	LRRF2_XENLA	GO:0009950;dorsal/ventral axis specification;GO:0016055;Wnt receptor signaling pathway	0
TC106217	9.62769e-09	0.12216	CA350093,s,om,10	SCMH1_MOUSE	GO:0009952;anterior/posterior pattern formation;GO:0006338;chromatin remodeling;GO:0016458;gene silencing;GO:0045892;negative regulation of transcription, DNA-dependent;GO:0007283;spermatogenesis;GO:0006351;transcription, DNA-dependent	GO:0010369;chromocenter
TC104648	1.45274e-05	0.321198	BX872782,s,om,10	I17RD_DANRE	GO:0009953;dorsal/ventral pattern formation;GO:0000188;inactivation of MAPK activity;GO:0040037;negative regulation of fibroblast growth factor receptor signaling pathway	GO:0016021;integral to membrane
TC110103	1.5321e-05	4.10835	CU071077,s,om,10	CSP_PLACL	GO:0009986;cell surface	0
TC127147	1.02637e-06	0.262451	BX876012,s,om,10	YL54_SCHPO	GO:0009986;cell surface;GO:0005576;extracellular region	0
TC121541	1.88194e-06	0.320167	CX256023,s,om,10	DTX3L_MOUSE	GO:0010390;histone monoubiquitination;GO:0006974;response to DNA damage stimulus	GO:0005737;cytoplasm;GO:0005634;nucleus
TC126917	8.88575e-09	0.0668771	CA358051,s,om,10	ESYT1_MOUSE	GO:0012505;endomembrane system;GO:0016021;integral to membrane	0
TC112421	4.26609e-05	0.300153	FYV3OTN01A3THN,s,om,10	TOM6_HUMAN	GO:0015031;protein transport	GO:0005741;mitochondrial outer membrane
TC112056	9.76814e-08	6.50824	BX295314,s,om,10	CHM4C_DANRE	GO:0015031;protein transport	GO:0005829;cytosol;GO:0031902;late endosome membrane
TC102959	0.00165806	0.297435	CA356791,s,om,10	VPS39_HUMAN	GO:0015031;protein transport	GO:0030897;HOPS complex;GO:0031902;late endosome membrane;GO:0005765;lysosomal membrane
TC97143	2.48429e-06	3.80928	FYV3OTN02HL52A,s,om,10	F125A_DANRE	GO:0015031;protein transport	GO:0031902;late endosome membrane
TC111674	2.11509e-06	3.42022	CA375568,s,om,10	RAB10_CHICK	GO:0015031;protein transport;GO:0007264;small GTPase mediated signal transduction	GO:0005886;plasma membrane
TC126901	1.01815e-09	0.0665618	CA377242,s,om,10	YG31B_YEAST	GO:0015074;DNA integration;GO:0006310;DNA recombination;GO:0006278;RNA-dependent DNA replication;GO:0046797;viral procapsid maturation	GO:0005737;cytoplasm;GO:0005634;nucleus
TC100159	3.72384e-07	0.212843	CA363397,s,om,10	POL_MLVAV	GO:0015074;DNA integration;GO:0006310;DNA recombination;GO:0006508;proteolysis;GO:0006278;RNA-dependent DNA replication	0
TC102166	1.71294e-07	0.174672	CA355428,s,om,10	POL_GALV	GO:0015074;DNA integration;GO:0006310;DNA recombination;GO:0006508;proteolysis;GO:0006278;RNA-dependent DNA replication	0
TC123579	3.07163e-08	11.0342	CA365052,s,om,10	TCB2_CAEBR	GO:0015074;DNA integration;GO:0006313;transposition, DNA-mediated	GO:0005634;nucleus
TC121130	1.96154e-06	3.41329	FYV3OTN01EDUBZ,s,om,10	TCB1_CAEBR	GO:0015074;DNA integration;GO:0006313;transposition, DNA-mediated	GO:0005634;nucleus
TC104032	2.34688e-05	3.29659	CA386781,s,om,10	TCB1_CAEBR	GO:0015074;DNA integration;GO:0006313;transposition, DNA-mediated	GO:0005634;nucleus
TC107581	2.91254e-05	3.42579	CA346596,s,om,10	AT5G3_BOVIN	GO:0015991;ATP hydrolysis coupled proton transport;GO:0015986;ATP synthesis coupled proton transport	GO:0016021;integral to membrane;GO:0031966;mitochondrial membrane;GO:0045263;proton-transporting ATP synthase complex, coupling factor F(o)
TC95890	6.49709e-08	23.2141	AY773715,s,om,10	MUCM_RABIT	GO:0016021;integral to membrane	0
TC132022	2.86516e-08	6.54582	BX310801,s,om,10	TM116_DANRE	GO:0016021;integral to membrane	0
TC103856	5.12618e-07	5.6129	BX319920,s,om,10	ODR4_HUMAN	GO:0016021;integral to membrane	0
TC101308	5.24642e-06	4.65524	CA355039,s,om,10	TMBI4_MOUSE	GO:0016021;integral to membrane	0
TC127514	7.07908e-06	4.15921	CR943183,s,om,10	GBP7_HUMAN	GO:0016021;integral to membrane	0
TC114322	0.000325033	3.50367	CA347019,s,om,10	M4A12_HUMAN	GO:0016021;integral to membrane	0
TC97429	8.2759e-05	3.48364	FP322657,s,om,10	TSN7_MOUSE	GO:0016021;integral to membrane	0
TC97855	0.00264885	3.12408	CA352168,s,om,10	T229B_HUMAN	GO:0016021;integral to membrane	0
TC97851	1.75805e-05	3.08166	CA341601,s,om,10	TM50A_MOUSE	GO:0016021;integral to membrane	0
TC103615	5.29138e-06	0.299758	BX880201,s,om,10	PSL2_HUMAN	GO:0016021;integral to membrane	0
TC122916	0.00110678	0.206388	BX303830,s,om,10	DEN4C_HUMAN	GO:0016021;integral to membrane	0
TC130671	1.00152e-07	0.119509	CB498309,s,om,10	C109B_HUMAN	GO:0016021;integral to membrane	0
TC101083	8.8248e-09	0.103263	CA341601,s,om,10	TM50A_MOUSE	GO:0016021;integral to membrane	0
TC115292	5.09321e-08	0.0932834	CX251206,s,om,10	TM208_DANRE	GO:0016021;integral to membrane	0
TC101652	6.05242e-10	0.0516875	CX251876,s,om,10	CS042_SINCH	GO:0016021;integral to membrane	0
TC107803	4.29462e-12	0.0112453	CB496724,s,om,10	CBLN2_HUMAN	GO:0016021;integral to membrane	0
TC101962	5.58792e-10	14.748	BX320756,s,om,10	NM_001141096,1	GO:0016021;integral to membrane,GO:0031224;intrinsic to membrane	0
TC100757	1.44516e-07	10.2909	F6VG15V01AN2RR,s,om,10	NM_001140074,1	GO:0016021;integral to membrane,GO:0031224;intrinsic to membrane	0
TC129881	8.18616e-07	4.58824	BX312788,s,om,10	NM_001140020,1	GO:0016021;integral to membrane,GO:0031224;intrinsic to membrane	0
TC116714	2.07189e-05	0.144828	BX311818,s,om,10	NM_001141644,1	GO:0016021;integral to membrane,GO:0031224;intrinsic to membrane	0
TC111831	3.72902e-13	0.00388443	CA345876,s,om,10	NM_001140268,1	GO:0016021;integral to membrane,GO:0031224;intrinsic to membrane	0
TC100325	5.11604e-06	0.291538	CX136675,s,om,10	CISD1_RAT	GO:0016021;integral to membrane;GO:0005741;mitochondrial outer membrane	0
TC121086	7.7224e-07	3.8478	CA388592,s,om,10	CX6C1_THUOB	GO:0016021;integral to membrane;GO:0005743;mitochondrial inner membrane	0
TC127091	0.000349067	3.13838	CA385056,s,om,10	MRP1_CANFA	GO:0016021;integral to membrane;GO:0005886;plasma membrane	0
TC124144	0.00146688	0.212066	AY870257,s,om,10	MUCM_ICTPU	GO:0016021;integral to membrane;GO:0005886;plasma membrane	0
TC102218	3.30611e-08	0.0521474	CA359281,s,om,10	FCRL1_HUMAN	GO:0016021;integral to membrane;GO:0005886;plasma membrane	0
TC119963	7.67759e-05	0.277933	CX031387,s,om,10	NEUR1_PONAB	GO:0016023;cytoplasmic membrane-bounded vesicle;GO:0043202;lysosomal lumen;GO:0005765;lysosomal membrane;GO:0005886;plasma membrane	0
TC126887	3.60098e-05	0.256164	BX863868,s,om,10	NM_001140535,1	GO:0016042;lipid catabolic process	0
TC130714	3.35873e-06	5.19133	CA382227,s,om,10	C209B_MOUSE	GO:0016045;detection of bacterium;GO:0001879;detection of yeast;GO:0006910;phagocytosis, recognition;GO:0050766;positive regulation of phagocytosis;GO:0042535;positive regulation of tumor necrosis factor biosynthetic process	GO:0009897;external side of plasma membrane;GO:0016021;integral to membrane
TC110569	9.80927e-09	20.8703	BX858309,s,om,10	CSK2B_DANRE	GO:0016055;Wnt receptor signaling pathway	GO:0005956;protein kinase CK2 complex
TC127301	0.000601736	3.06144	BX307182,s,om,10	IRF7_MOUSE	GO:0016064;immunoglobulin mediated immune response;GO:0006355;regulation of transcription, DNA-dependent;GO:0009615;response to virus;GO:0045351;type I interferon biosynthetic process	GO:0005737;cytoplasm;GO:0005634;nucleus
TC125589	5.66093e-07	5.88378	BX310088,s,om,10	IF5_PONAB	GO:0016070;RNA metabolic process	0
TC116815	3.98975e-09	0.085282	BX086058,s,om,10	GPI8_HUMAN	GO:0016255;attachment of GPI anchor to protein;GO:0006501;C-terminal protein lipidation;GO:0006467;protein thiol-disulfide exchange;GO:0006508;proteolysis	GO:0042765;GPI-anchor transamidase complex
TC103636	2.51971e-07	0.201952	BX073747,s,om,10	ANXA1_HORSE	GO:0016323;basolateral plasma membrane;GO:0005929;cilium;GO:0005737;cytoplasm;GO:0005634;nucleus	0
TC98469	2.40589e-09	0.0783146	FP320781,s,om,10	MAL2_BOVIN	GO:0016324;apical plasma membrane;GO:0016021;integral to membrane	0
TC120180	2.1537e-06	0.219892	CX262647,s,om,10	DNM3A_CHICK	GO:0016568;chromatin modification;GO:0006355;regulation of transcription, DNA-dependent;GO:0006351;transcription, DNA-dependent	GO:0005737;cytoplasm;GO:0000791;euchromatin;GO:0016363;nuclear matrix
TC127959	0.00014462	0.190851	CX139430,s,om,10	LYSC2_ONCMY	GO:0016998;cell wall macromolecule catabolic process;GO:0019835;cytolysis;GO:0042742;defense response to bacterium	GO:0005576;extracellular region
TC127723	1.7367e-06	0.157605	DV192755,s,om,10	LYSC2_ONCMY	GO:0016998;cell wall macromolecule catabolic process;GO:0019835;cytolysis;GO:0042742;defense response to bacterium	GO:0005576;extracellular region
TC112167	0.000225686	3.75125	CA361352,s,om,10	LYG_PAROL	GO:0016998;cell wall macromolecule catabolic process;GO:0019835;cytolysis;GO:0042742;defense response to bacterium;GO:0009253;peptidoglycan catabolic process	0
TC132065	0.000350151	3.69844	CA361352,s,om,10	LYG_PAROL	GO:0016998;cell wall macromolecule catabolic process;GO:0019835;cytolysis;GO:0042742;defense response to bacterium;GO:0009253;peptidoglycan catabolic process	0
TC94773	2.02296e-05	6.095	AF100931,s,om,10	CBR1_RAT	GO:0017144;drug metabolic process;GO:0001542;ovulation from ovarian follicle;GO:0018205;peptidyl-lysine modification;GO:0042376;phylloquinone catabolic process;GO:0034698;response to gonadotropin stimulus;GO:0033574;response to testosterone stimulus	GO:0005829;cytosol;GO:0005792;microsome;GO:0005902;microvillus;GO:0005634;nucleus;GO:0005886;plasma membrane
TC128519	5.19479e-05	3.29289	CX248862,s,om,10	SETD3_MOUSE	GO:0018027;peptidyl-lysine dimethylation;GO:0018026;peptidyl-lysine monomethylation;GO:0018023;peptidyl-lysine trimethylation;GO:0045893;positive regulation of transcription, DNA-dependent;GO:0006351;transcription, DNA-dependent	GO:0005634;nucleus
TC128748	0.000504061	3.60298	DV190838,s,om,10	NM_001141723,1	GO:0018149;peptide cross-linking	0
TC95181	0.000182543	3.11207	CA341918,s,om,10	AMBP_PLEPL	GO:0018298;protein-chromophore linkage	GO:0005576;extracellular region
TC111377	1.5321e-05	4.55437	CA344536,s,om,10	CGL_BOVIN	GO:0019344;cysteine biosynthetic process;GO:0070814;hydrogen sulfide biosynthetic process;GO:0018272;protein-pyridoxal-5-phosphate linkage via peptidyl-N6-pyridoxal phosphate-L-lysine	GO:0005737;cytoplasm
TC106122	5.09061e-05	0.14145	CA362588,s,om,10	PERF_MOUSE	GO:0019835;cytolysis;GO:0002357;defense response to tumor cell;GO:0051607;defense response to virus;GO:0002418;immune response to tumor cell;GO:0051260;protein homooligomerization	GO:0044194;cytolytic granule;GO:0016023;cytoplasmic membrane-bounded vesicle;GO:0031904;endosome lumen;GO:0005576;extracellular region;GO:0016021;integral to membrane;GO:0005886;plasma membrane
TC122649	8.60644e-06	0.261707	CX066786,s,om,10	STXB_SYNVE	GO:0019835;cytolysis;GO:0044179;hemolysis in other organism	GO:0005576;extracellular region
TC118845	1.89915e-05	0.299969	BX317766,s,om,10	STXB_SYNHO	GO:0019835;cytolysis;GO:0044179;hemolysis in other organism;GO:0009405;pathogenesis	GO:0005576;extracellular region
TC123017	3.91686e-06	0.260574	CX067574,s,om,10	STXA_SYNHO	GO:0019835;cytolysis;GO:0044179;hemolysis in other organism;GO:0009405;pathogenesis	GO:0005576;extracellular region
TC123317	4.64045e-08	27.5858	CX247084,s,om,10	PSB8_RAT	GO:0019882;antigen processing and presentation;GO:0051603;proteolysis involved in cellular protein catabolic process	GO:0005737;cytoplasm;GO:0005634;nucleus;GO:0005839;proteasome core complex
TC101273	1.88194e-06	8.81292	CX247084,s,om,10	PSB8_RAT	GO:0019882;antigen processing and presentation;GO:0051603;proteolysis involved in cellular protein catabolic process	GO:0005737;cytoplasm;GO:0005634;nucleus;GO:0005839;proteasome core complex
TC130302	3.73962e-06	0.173538	CX148957,s,om,10	HMW3_MYCPN	GO:0020035;cytoadherence to microvasculature, mediated by symbiont protein;GO:0009405;pathogenesis	GO:0033111;attachment organelle membrane;GO:0042995;cell projection;GO:0005886;plasma membrane
TC116376	0.00205812	3.40664	GE827144,s,om,10	CYBR1_XENTR	GO:0022900;electron transport chain;GO:0006810;transport	GO:0016021;integral to membrane
TC97249	6.67823e-06	0.272552	BX073009,s,om,10	TEKT4_RAT	GO:0030030;cell projection organization;GO:0000226;microtubule cytoskeleton organization	GO:0035085;cilium axoneme;GO:0035086;flagellar axoneme;GO:0005874;microtubule
TC103895	0.000627527	0.324434	BX297165,s,om,10	NRAP_MOUSE	GO:0030036;actin cytoskeleton organization	GO:0005916;fascia adherens;GO:0005927;muscle tendon junction;GO:0030016;myofibril
TC109245	0.000243364	3.49798	CA356764,s,om,10	ELMO1_MOUSE	GO:0030036;actin cytoskeleton organization;GO:0006915;apoptosis;GO:0006928;cellular component movement;GO:0006911;phagocytosis, engulfment;GO:0016601;Rac protein signal transduction	GO:0005737;cytoplasm;GO:0005856;cytoskeleton;GO:0005886;plasma membrane
TC102831	4.02609e-08	0.146825	CA378234,s,om,10	ELMO1_MOUSE	GO:0030036;actin cytoskeleton organization;GO:0006915;apoptosis;GO:0006928;cellular component movement;GO:0006911;phagocytosis, engulfment;GO:0016601;Rac protein signal transduction	GO:0005737;cytoplasm;GO:0005856;cytoskeleton;GO:0005886;plasma membrane
TC94860	0.00279659	0.297867	AF483527,s,om,10	GROA_HUMAN	GO:0030036;actin cytoskeleton organization;GO:0008283;cell proliferation;GO:0006935;chemotaxis;GO:0007186;G-protein coupled receptor protein signaling pathway;GO:0006955;immune response;GO:0006954;inflammatory response;GO:0035556;intracellular signal transduction;GO:0008285;negative regulation of cell proliferation;GO:0007399;nervous system development	GO:0005615;extracellular space
TC95280	2.96814e-06	3.34349	BX910702,s,om,10	ARC1A_HUMAN	GO:0030036;actin cytoskeleton organization;GO:0030833;regulation of actin filament polymerization	GO:0015629;actin cytoskeleton;GO:0005737;cytoplasm
TC109433	1.16737e-05	4.40584	BX881702,s,om,10	TYBA_CYPCA	GO:0030036;actin cytoskeleton organization;GO:0042989;sequestering of actin monomers	GO:0005737;cytoplasm;GO:0005856;cytoskeleton
TC108322	2.6924e-06	9.45229	BX077555,s,om,10	FMN2_MOUSE	GO:0030036;actin cytoskeleton organization;GO:0051295;establishment of meiotic spindle localization;GO:0016344;meiotic chromosome movement towards spindle pole;GO:0007132;meiotic metaphase I;GO:0007275;multicellular organismal development;GO:0048477;oogenesis;GO:0040038;polar body extrusion after meiotic divisions	GO:0015629;actin cytoskeleton
TC124150	9.40689e-05	3.31472	CA366008,s,om,10	NEBU_HUMAN	GO:0030049;muscle filament sliding;GO:0007517;muscle organ development;GO:0030832;regulation of actin filament length;GO:0007525;somatic muscle development	GO:0015629;actin cytoskeleton;GO:0005829;cytosol;GO:0030018;Z disc
TC103580	4.04106e-06	5.75599	CA366574,s,om,10	TDRD9_DANRE	GO:0030154;cell differentiation;GO:0043046;DNA methylation involved in gamete generation;GO:0009566;fertilization;GO:0031047;gene silencing by RNA;GO:0007140;male meiosis;GO:0007275;multicellular organismal development;GO:0034587;piRNA metabolic process;GO:0007283;spermatogenesis	GO:0005634;nucleus;GO:0071547;piP-body
TC102618	0.00193768	3.12952	BX305189,s,om,10	RBM24_DANRE	GO:0030154;cell differentiation;GO:0043488;regulation of mRNA stability;GO:0010830;regulation of myotube differentiation	GO:0005737;cytoplasm;GO:0005634;nucleus
TC122191	1.83027e-06	5.01876	BX079590,s,om,10	FBX44_MOUSE	GO:0030163;protein catabolic process	GO:0019005;SCF ubiquitin ligase complex
TC95641	9.60611e-05	3.3174	BX875847,s,om,10	HIOM_CHICK	GO:0030187;melatonin biosynthetic process	0
TC110288	0.00140402	3.5352	CX722292,s,om,10	PPN_DROME	GO:0030198;extracellular matrix organization;GO:0007275;multicellular organismal development	GO:0005604;basement membrane
TC129249	4.30566e-06	4.31301	CA368886,s,om,10	NM_001160703,1	GO:0030258;lipid modification,GO:0030259;lipid glycosylation	0
TC131218	9.67268e-10	9.73719	BX305742,s,om,10	NOG1_MOUSE	GO:0030336;negative regulation of cell migration;GO:0008285;negative regulation of cell proliferation;GO:0022408;negative regulation of cell-cell adhesion;GO:0033342;negative regulation of collagen binding;GO:0008156;negative regulation of DNA replication;GO:0031397;negative regulation of protein ubiquitination;GO:0050821;protein stabilization;GO:0000079;regulation of cyclin-dependent protein kin…	GO:0005730;nucleolus;GO:0048471;perinuclear region of cytoplasm
TC119283	0.00416273	3.1172	FP324676,s,om,10	RS14_RAT	GO:0030490;maturation of SSU-rRNA;GO:0000028;ribosomal small subunit assembly;GO:0006412;translation	GO:0022627;cytosolic small ribosomal subunit
TC127982	1.77579e-06	4.43237	CX250385,s,om,10	NCOA3_HUMAN	GO:0030521;androgen receptor signaling pathway;GO:0044255;cellular lipid metabolic process;GO:0045944;positive regulation of transcription from RNA polymerase II promoter;GO:0006351;transcription, DNA-dependent	GO:0005654;nucleoplasm
TC121902	0.00916722	0.321076	CA366266,s,om,10	MMP9_HUMAN	GO:0030574;collagen catabolic process;GO:0030225;macrophage differentiation;GO:0051549;positive regulation of keratinocyte migration;GO:0006508;proteolysis	GO:0005615;extracellular space;GO:0005578;proteinaceous extracellular matrix
TC100726	0.000140472	0.320411	BX317159,s,om,10	COR1A_BOVIN	GO:0030595;leukocyte chemotaxis;GO:0051126;negative regulation of actin nucleation;GO:0001845;phagolysosome assembly;GO:0050918;positive chemotaxis;GO:0008360;regulation of cell shape;GO:0032796;uropod organization	GO:0030864;cortical actin cytoskeleton;GO:0030027;lamellipodium;GO:0001891;phagocytic cup;GO:0030670;phagocytic vesicle membrane
TC120552	0.000122916	0.316157	BX317159,s,om,10	COR1A_BOVIN	GO:0030595;leukocyte chemotaxis;GO:0051126;negative regulation of actin nucleation;GO:0001845;phagolysosome assembly;GO:0050918;positive chemotaxis;GO:0008360;regulation of cell shape;GO:0032796;uropod organization	GO:0030864;cortical actin cytoskeleton;GO:0030027;lamellipodium;GO:0001891;phagocytic cup;GO:0030670;phagocytic vesicle membrane
TC116668	4.61411e-07	0.21589	FP324064,s,om,10	UPK1B_HUMAN	GO:0030855;epithelial cell differentiation	GO:0016021;integral to membrane
TC113145	4.98787e-05	0.260632	BX311489,s,om,10	PSD13_HUMAN	GO:0031145;anaphase-promoting complex-dependent proteasomal ubiquitin-dependent protein catabolic process;GO:0006915;apoptosis;GO:0006977;DNA damage response, signal transduction by p53 class mediator resulting in cell cycle arrest;GO:0000082;G1/S transition of mitotic cell cycle;GO:0000216;M/G1 transition of mitotic cell cycle;GO:0016071;mRNA metabolic process;GO:0051436;negative regulation of u…	GO:0005838;proteasome regulatory particle
TC118895	4.70629e-06	0.197813	BX311489,s,om,10	PSD13_HUMAN	GO:0031145;anaphase-promoting complex-dependent proteasomal ubiquitin-dependent protein catabolic process;GO:0006915;apoptosis;GO:0006977;DNA damage response, signal transduction by p53 class mediator resulting in cell cycle arrest;GO:0000082;G1/S transition of mitotic cell cycle;GO:0000216;M/G1 transition of mitotic cell cycle;GO:0016071;mRNA metabolic process;GO:0051436;negative regulation of u…	GO:0005838;proteasome regulatory particle
TC105016	5.71397e-07	0.228321	CA369347,s,om,10	APC10_MOUSE	GO:0031145;anaphase-promoting complex-dependent proteasomal ubiquitin-dependent protein catabolic process;GO:0051301;cell division;GO:0007067;mitosis;GO:0070979;protein K11-linked ubiquitination;GO:0030071;regulation of mitotic metaphase/anaphase transition	GO:0005680;anaphase-promoting complex
TC131100	5.78516e-05	3.21335	CA353022,s,om,10	HYR1_CANAL	GO:0031225;anchored to membrane;GO:0005618;cell wall;GO:0005576;extracellular region;GO:0016021;integral to membrane;GO:0005886;plasma membrane	0
TC118931	1.63651e-09	0.080555	CA365920,s,om,10	YH5D_SCHPO	GO:0031225;anchored to membrane;GO:0009986;cell surface;GO:0005783;endoplasmic reticulum;GO:0005886;plasma membrane	0
TC121864	6.16729e-06	0.117239	BX878684,s,om,10	CEAM5_HUMAN	GO:0031225;anchored to membrane;GO:0016323;basolateral plasma membrane;GO:0005887;integral to plasma membrane	0
TC122065	9.28004e-06	0.31707	BX877112,s,om,10	ARFG3_BOVIN	GO:0032312;regulation of ARF GTPase activity;GO:0016192;vesicle-mediated transport	GO:0000139;Golgi membrane
TC108490	0.000852784	3.55409	CA344050,s,om,10	FBLN3_MACFA	GO:0032331;negative regulation of chondrocyte differentiation;GO:0018108;peptidyl-tyrosine phosphorylation;GO:0006355;regulation of transcription, DNA-dependent	GO:0005615;extracellular space;GO:0005578;proteinaceous extracellular matrix
TC125779	0.000324755	3.14846	FYV3OTN01AHRPQ,s,om,10	ABCA1_HUMAN	GO:0032488;Cdc42 protein signal transduction;GO:0044255;cellular lipid metabolic process;GO:0033344;cholesterol efflux;GO:0042632;cholesterol homeostasis;GO:0008203;cholesterol metabolic process;GO:0016197;endosome transport;GO:0007186;G-protein coupled receptor protein signaling pathway;GO:0034380;high-density lipoprotein particle assembly;GO:0050702;interleukin-1 beta secretion;GO:0032367;intra…	GO:0005887;integral to plasma membrane;GO:0005624;membrane fraction;GO:0045121;membrane raft;GO:0045335;phagocytic vesicle
TC117386	0.00121053	4.98708	CA369564,s,om,10	ABCBA_HUMAN	GO:0032592;integral to mitochondrial membrane;GO:0005743;mitochondrial inner membrane	0
TC115648	3.91445e-05	3.1549	CA342400,s,om,10	ASGL1_DANRE	GO:0033345;asparagine catabolic process via L-aspartate	GO:0005737;cytoplasm
TC111291	2.96955e-05	3.65998	CA361647,s,om,10	NF2L2_MOUSE	GO:0034599;cellular response to oxidative stress;GO:0030968;endoplasmic reticulum unfolded protein response;GO:0030194;positive regulation of blood coagulation;GO:2000379;positive regulation of reactive oxygen species metabolic process;GO:0045944;positive regulation of transcription from RNA polymerase II promoter;GO:0045995;regulation of embryonic development;GO:2000121;regulation of removal of …	GO:0000785;chromatin;GO:0005829;cytosol;GO:0005634;nucleus
TC111842	3.34384e-07	0.145336	CR363290,s,om,10	TTLL3_MOUSE	GO:0035082;axoneme assembly;GO:0042384;cilium assembly;GO:0018094;protein polyglycylation	GO:0035085;cilium axoneme;GO:0005737;cytoplasm;GO:0005874;microtubule
TC98979	0.000996407	3.3574	BX304426,s,om,10	CISH_HUMAN	GO:0035556;intracellular signal transduction;GO:0009968;negative regulation of signal transduction;GO:0001558;regulation of cell growth	0
TC106896	0.000106529	4.48427	BX304425,s,om,10	CISH_CHICK	GO:0035556;intracellular signal transduction;GO:0009968;negative regulation of signal transduction;GO:0040008;regulation of growth	0
TC108424	2.53105e-08	6.52354	BX865001,s,om,10	CNIH_PONAB	GO:0035556;intracellular signal transduction;GO:0016192;vesicle-mediated transport	GO:0005789;endoplasmic reticulum membrane;GO:0000139;Golgi membrane;GO:0016021;integral to membrane
TC125421	1.08057e-05	0.314521	CX255689,s,om,10	DNMBP_MOUSE	GO:0035556;intracellular signal transduction;GO:0035023;regulation of Rho protein signal transduction	GO:0030054;cell junction;GO:0005856;cytoskeleton;GO:0005795;Golgi stack;GO:0045202;synapse
TC132235	4.41036e-05	3.95145	CA368021,s,om,10	SOCS3_CHICK	GO:0035556;intracellular signal transduction;GO:0040008;regulation of growth	0
TC119171	0.000141817	3.37035	BX857660,s,om,10	IFT20_DANRE	GO:0042073;intraflagellar transport	GO:0005930;axoneme;GO:0005794;Golgi apparatus;GO:0005932;microtubule basal body
TC111510	8.87846e-07	0.148576	CA383388,s,om,10	NOG2_HUMAN	GO:0042254;ribosome biogenesis	GO:0005730;nucleolus
TC122004	2.80964e-08	10.7869	CB495123,s,om,10	NIP7_TETNG	GO:0042255;ribosome assembly	GO:0005730;nucleolus
TC122217	0.000630656	0.26317	CA355658,s,om,10	NALP1_HUMAN	GO:0042742;defense response to bacterium;GO:0006917;induction of apoptosis;GO:0051402;neuron apoptosis;GO:0050718;positive regulation of interleukin-1 beta secretion;GO:0032495;response to muramyl dipeptide	GO:0005737;cytoplasm;GO:0072558;NALP1 inflammasome complex;GO:0005634;nucleus
TC120592	0.00020222	4.00995	CA371074,s,om,10	CATA_PIG	GO:0042744;hydrogen peroxide catabolic process;GO:0051781;positive regulation of cell division	GO:0005777;peroxisome
TC117175	6.32731e-05	3.80414	CA351988,s,om,10	ABCF2_HUMAN	GO:0043190;ATP-binding cassette (ABC) transporter complex;GO:0005740;mitochondrial envelope	0
TC101086	0.000935296	3.0096	BX088394,s,om,10	TGM2_HUMAN	GO:0043277;apoptotic cell clearance;GO:0018149;peptide cross-linking;GO:0045785;positive regulation of cell adhesion	0
TC118935	2.18523e-07	6.18061	CA388230,s,om,10	GANAB_HUMAN	GO:0043687;post-translational protein modification;GO:0006457;protein folding;GO:0018279;protein N-linked glycosylation via asparagine	GO:0005788;endoplasmic reticulum lumen;GO:0005794;Golgi apparatus;GO:0042470;melanosome
TC101519	2.08685e-05	0.322938	AM887838,s,om,10	TRI16_PONAB	GO:0043966;histone H3 acetylation;GO:0043967;histone H4 acetylation;GO:0050718;positive regulation of interleukin-1 beta secretion;GO:0045618;positive regulation of keratinocyte differentiation;GO:0048386;positive regulation of retinoic acid receptor signaling pathway;GO:0045893;positive regulation of transcription, DNA-dependent;GO:0060416;response to growth hormone stimulus;GO:0046683;response …	GO:0005737;cytoplasm;GO:0016605;PML body
TC111645	0.000457259	4.24643	CA357045,s,om,10	TDH_BOVIN	GO:0044237;cellular metabolic process	GO:0005739;mitochondrion
TC108726	1.31072e-08	13.0863	CA373931,s,om,10	MDHC_XENTR	GO:0044262;cellular carbohydrate metabolic process;GO:0006108;malate metabolic process;GO:0006099;tricarboxylic acid cycle	GO:0005737;cytoplasm
TC126492	0.000813601	3.12193	BX886511,s,om,10	EBNA6_EBVG	GO:0044419;interspecies interaction between organisms;GO:0006355;regulation of transcription, DNA-dependent;GO:0006351;transcription, DNA-dependent;GO:0016032;viral reproduction	GO:0044204;host cell nuclear matrix
TC105906	0.00151054	4.72272	FP320422,s,om,10	TAF4_HUMAN	GO:0044419;interspecies interaction between organisms;GO:0006368;transcription elongation from RNA polymerase II promoter;GO:0006367;transcription initiation from RNA polymerase II promoter;GO:0016032;viral reproduction	GO:0005737;cytoplasm;GO:0071339;MLL1 complex;GO:0005669;transcription factor TFIID complex;GO:0033276;transcription factor TFTC complex
TC130127	1.96571e-06	0.170308	BX080283,s,om,10	RPC4_BOVIN	GO:0045087;innate immune response;GO:0045089;positive regulation of innate immune response;GO:0032728;positive regulation of interferon-beta production;GO:0009615;response to virus;GO:0006383;transcription from RNA polymerase III promoter	GO:0005666;DNA-directed RNA polymerase III complex
TC95958	1.54495e-06	0.287758	BX312020,s,om,10	EFHD2_BOVIN	GO:0045121;membrane raft	0
TC101225	8.94948e-05	4.59648	BX076064,s,om,10	CEBPD_MOUSE	GO:0045444;fat cell differentiation;GO:0045944;positive regulation of transcription from RNA polymerase II promoter	GO:0005634;nucleus
TC105271	0.000633411	3.37223	BX076064,s,om,10	CEBPD_MOUSE	GO:0045444;fat cell differentiation;GO:0045944;positive regulation of transcription from RNA polymerase II promoter	GO:0005634;nucleus
TC107761	3.78968e-05	0.317298	CA347908,s,om,10	TXND5_MOUSE	GO:0045454;cell redox homeostasis;GO:0006662;glycerol ether metabolic process	GO:0005788;endoplasmic reticulum lumen
TC104525	3.54437e-05	0.185815	CA347908,s,om,10	TXND5_MOUSE	GO:0045454;cell redox homeostasis;GO:0006662;glycerol ether metabolic process	GO:0005788;endoplasmic reticulum lumen
TC108168	1.38206e-08	10.5162	BX085752,s,om,10	RDH12_HUMAN	GO:0045494;photoreceptor cell maintenance;GO:0050896;response to stimulus;GO:0042572;retinol metabolic process	GO:0005622;intracellular
TC100613	1.07732e-06	3.38146	BX859068,s,om,10	NELFB_MOUSE	GO:0045892;negative regulation of transcription, DNA-dependent;GO:0006351;transcription, DNA-dependent	GO:0005634;nucleus
TC109678	0.000736514	6.13774	CB494519,s,om,10	HIF1A_CHICK	GO:0045893;positive regulation of transcription, DNA-dependent;GO:0001666;response to hypoxia	GO:0005737;cytoplasm;GO:0005634;nucleus
TC100585	1.31146e-06	0.266815	CR372476,s,om,10	RNF4_RAT	GO:0045944;positive regulation of transcription from RNA polymerase II promoter;GO:0043161;proteasomal ubiquitin-dependent protein catabolic process;GO:0051865;protein autoubiquitination;GO:0070979;protein K11-linked ubiquitination;GO:0070936;protein K48-linked ubiquitination;GO:0085020;protein K6-linked ubiquitination;GO:0070534;protein K63-linked ubiquitination;GO:0090234;regulation of kinetoch…	GO:0005737;cytoplasm;GO:0016605;PML body
TC103993	1.88194e-06	0.265401	CR372476,s,om,10	RNF4_RAT	GO:0045944;positive regulation of transcription from RNA polymerase II promoter;GO:0043161;proteasomal ubiquitin-dependent protein catabolic process;GO:0051865;protein autoubiquitination;GO:0070979;protein K11-linked ubiquitination;GO:0070936;protein K48-linked ubiquitination;GO:0085020;protein K6-linked ubiquitination;GO:0070534;protein K63-linked ubiquitination;GO:0090234;regulation of kinetoch…	GO:0005737;cytoplasm;GO:0016605;PML body
TC130519	2.98562e-09	0.0657924	CX152778,s,om,10	BT2A2_PONAB	GO:0046007;negative regulation of activated T cell proliferation;GO:0031324;negative regulation of cellular metabolic process;GO:0050710;negative regulation of cytokine secretion	GO:0016021;integral to membrane
TC119956	1.74025e-06	4.30376	CA371781,s,om,10	CDO1_DANRE	GO:0046439;L-cysteine metabolic process	0
TC102571	9.65986e-06	0.210737	CA363834,s,om,10	Y1092_MYCBO	GO:0046470;phosphatidylcholine metabolic process	0
TC106099	0.000685323	3.3915	BX311400,s,om,10	ACTN3_HUMAN	GO:0048041;focal adhesion assembly;GO:0030049;muscle filament sliding;GO:0042981;regulation of apoptosis	GO:0005884;actin filament;GO:0005829;cytosol;GO:0005925;focal adhesion;GO:0031143;pseudopodium
TC99020	9.13958e-06	0.184308	BX078522,s,om,10	UROM_MOUSE	GO:0048878;chemical homeostasis;GO:0007588;excretion;GO:0072218;metanephric ascending thin limb development;GO:0072221;metanephric distal convoluted tubule development;GO:0072233;metanephric thick ascending limb development;GO:2000021;regulation of ion homeostasis	GO:0031225;anchored to membrane;GO:0016324;apical plasma membrane;GO:0016323;basolateral plasma membrane;GO:0060170;cilium membrane;GO:0072372;primary cilium;GO:0000922;spindle pole
TC118679	0.00017508	3.33123	CA357335,s,om,10	MMSA_MOUSE	GO:0050873;brown fat cell differentiation	GO:0005739;mitochondrion
TC105796	1.6847e-06	5.35881	CA352104,s,om,10	ANFC2_ONCMY	GO:0050880;regulation of blood vessel size	GO:0005576;extracellular region
TC96487	3.59089e-06	3.95497	BX078245,s,om,10	ANFC1_ONCMY	GO:0050880;regulation of blood vessel size	GO:0005576;extracellular region
TC124008	0.000235524	3.38039	CA383469,s,om,10	RG1BB_DANRE	GO:0051056;regulation of small GTPase mediated signal transduction;GO:0007264;small GTPase mediated signal transduction	GO:0005622;intracellular
TC121534	0.00482927	4.38054	BX085900,s,om,10	CDC6_HUMAN	GO:0051301;cell division;GO:0006260;DNA replication;GO:0000076;DNA replication checkpoint;GO:0000216;M/G1 transition of mitotic cell cycle;GO:0007067;mitosis;GO:0008285;negative regulation of cell proliferation;GO:0071777;positive regulation of cell cycle cytokinesis;GO:0051984;positive regulation of chromosome segregation;GO:0000079;regulation of cyclin-dependent protein kinase activity;GO:00900…	GO:0005829;cytosol;GO:0005654;nucleoplasm;GO:0051233;spindle midzone;GO:0000922;spindle pole
TC98034	9.46936e-07	0.164708	BX314747,s,om,10	RCC1_HUMAN	GO:0051301;cell division;GO:0007059;chromosome segregation;GO:0000082;G1/S transition of mitotic cell cycle;GO:0007067;mitosis;GO:0007052;mitotic spindle organization;GO:0007088;regulation of mitosis;GO:0007090;regulation of S phase of mitotic cell cycle;GO:0051225;spindle assembly;GO:0016032;viral reproduction	GO:0000794;condensed nuclear chromosome;GO:0005737;cytoplasm;GO:0000790;nuclear chromatin;GO:0031965;nuclear membrane;GO:0005654;nucleoplasm
TC111990	3.52429e-06	0.293113	CA357387,s,om,10	CCNG1_PONAB	GO:0051301;cell division;GO:0007067;mitosis	GO:0005634;nucleus
TC110786	9.52003e-06	17.0296	BX086608,s,om,10	SETD8_BOVIN	GO:0051301;cell division;GO:0007067;mitosis;GO:0000122;negative regulation of transcription from RNA polymerase II promoter;GO:0018026;peptidyl-lysine monomethylation;GO:0043516;regulation of DNA damage response, signal transduction by p53 class mediator;GO:0006351;transcription, DNA-dependent	GO:0005694;chromosome;GO:0005634;nucleus
TC128965	1.07278e-05	17.0279	BX086608,s,om,10	SETD8_BOVIN	GO:0051301;cell division;GO:0007067;mitosis;GO:0000122;negative regulation of transcription from RNA polymerase II promoter;GO:0018026;peptidyl-lysine monomethylation;GO:0043516;regulation of DNA damage response, signal transduction by p53 class mediator;GO:0006351;transcription, DNA-dependent	GO:0005694;chromosome;GO:0005634;nucleus
TC106051	5.02412e-07	0.219582	BX875961,s,om,10	CDK7_XENLA	GO:0051301;cell division;GO:0007126;meiosis;GO:0006468;protein phosphorylation	GO:0005634;nucleus
TC106801	3.03473e-05	4.14755	BX309486,s,om,10	PSB7_RAT	GO:0051603;proteolysis involved in cellular protein catabolic process	GO:0005737;cytoplasm;GO:0005634;nucleus;GO:0005839;proteasome core complex
TC95921	3.86444e-05	3.85689	CA359454,s,om,10	PB6LB_SALSA	GO:0051603;proteolysis involved in cellular protein catabolic process	GO:0005737;cytoplasm;GO:0005634;nucleus;GO:0005839;proteasome core complex
TC95613	4.64045e-08	0.131173	AF115540,s,om,10	PB6LB_SALSA	GO:0051603;proteolysis involved in cellular protein catabolic process	GO:0005737;cytoplasm;GO:0005634;nucleus;GO:0005839;proteasome core complex
TC105279	1.55242e-05	3.20658	CX250847,s,om,10	AGO2_DROME	GO:0051607;defense response to virus;GO:0033227;dsRNA transport;GO:0070868;heterochromatin organization involved in chromatin silencing;GO:0044419;interspecies interaction between organisms;GO:0045071;negative regulation of viral genome replication;GO:0007279;pole cell formation;GO:0030422;production of siRNA involved in RNA interference;GO:0035071;salivary gland cell autophagic cell death;GO:000…	GO:0005737;cytoplasm;GO:0070578;RISC-loading complex;GO:0016442;RNA-induced silencing complex
TC99349	9.80927e-09	0.0684033	CA360199,s,om,10	CAPG_RAT	GO:0051693;actin filament capping	GO:0005576;extracellular region;GO:0042470;melanosome
TC120952	5.58792e-10	0.0589489	CA374021,s,om,10	CAPG_RAT	GO:0051693;actin filament capping	GO:0005576;extracellular region;GO:0042470;melanosome
TC121975	9.21946e-06	7.47979	CA358155,s,om,10	FCER2_HUMAN	GO:0051712;positive regulation of killing of cells of other organism;GO:0051773;positive regulation of nitric-oxide synthase 2 biosynthetic process;GO:0051000;positive regulation of nitric-oxide synthase activity	GO:0005576;extracellular region;GO:0005887;integral to plasma membrane
TC98835	4.98517e-08	0.0972895	BX319063,s,om,10	KCNA5_RAT	GO:0055075;potassium ion homeostasis;GO:0051259;protein oligomerization;GO:0051481;reduction of cytosolic calcium ion concentration;GO:0001666;response to hypoxia	GO:0008076;voltage-gated potassium channel complex
TC104869	0.00017518	3.38605	F6VG15V01ESQPB,s,om,10	NM_001123687,1	GO:0055114;oxidation reduction	0
TC104017	5.20339e-05	0.306199	CA349446,s,om,10	DCTN2_DANRE	GO:0060117;auditory receptor cell development;GO:0040023;establishment of nucleus localization;GO:0035088;establishment or maintenance of apical/basal cell polarity;GO:0001754;eye photoreceptor cell differentiation;GO:0010001;glial cell differentiation;GO:0007017;microtubule-based process;GO:0030719;P granule organization;GO:0045494;photoreceptor cell maintenance	GO:0005869;dynactin complex;GO:0030286;dynein complex;GO:0016020;membrane;GO:0005874;microtubule;GO:0005815;microtubule organizing center
TC105502	1.88961e-06	5.62951	BX087564,s,om,10	MYLK_HUMAN	GO:0060414;aorta smooth muscle tissue morphogenesis;GO:0006936;muscle contraction;GO:0006468;protein phosphorylation	GO:0005829;cytosol
TC95974	1.38232e-08	0.037675	CA344121,s,om,10	UPAR_RAT	GO:0060742;epithelial cell differentiation involved in prostate gland development;GO:0048762;mesenchymal cell differentiation;GO:0043066;negative regulation of apoptosis;GO:0010629;negative regulation of gene expression;GO:0010628;positive regulation of gene expression;GO:0043403;skeletal muscle tissue regeneration	GO:0031225;anchored to membrane;GO:0005576;extracellular region;GO:0005886;plasma membrane
TC99363	2.40364e-05	0.214963	BX084405,s,om,10	MGST1_PIG	GO:0070207;protein homotrimerization	GO:0005789;endoplasmic reticulum membrane;GO:0016021;integral to membrane;GO:0005792;microsome;GO:0005741;mitochondrial outer membrane
TC120420	8.86517e-08	0.180374	CX153438,s,om,10	MGST1_PIG	GO:0070207;protein homotrimerization	GO:0005789;endoplasmic reticulum membrane;GO:0016021;integral to membrane;GO:0005792;microsome;GO:0005741;mitochondrial outer membrane
TC122368	1.58735e-06	0.22577	CA380108,s,om,10	BICD2_MOUSE	GO:0072393;microtubule anchoring at microtubule organizing center;GO:0072385;minus-end-directed organelle transport along microtubule	GO:0031410;cytoplasmic vesicle;GO:0005856;cytoskeleton;GO:0005794;Golgi apparatus

## Sheet: Genes of special interest
Spot ID	Adj. pValue	Fold :B57/A3, ie S/R	Name (EST)	Best hit accession	GO	GO
TC99217	2.5033e-07	7.26594	BX073772,s,om,10	OGG1_RAT	GO:0002526;acute inflammatory response;GO:0006284;base-excision repair;GO:0071276;cellular response to cadmium ion;GO:0006289;nucleotide-excision repair;GO:0033158;regulation of protein import into nucleus, translocation;GO:0006355;regulation of transcription, DNA-dependent;GO:0042493;response to drug;GO:0032355;response to estradiol stimulus;GO:0045471;response to ethanol;GO:0051593;response to …	GO:0005739;mitochondrion;GO:0016363;nuclear matrix;GO:0016607;nuclear speck
TC123406	1.95618e-08	0.0566352	BX085885,s,om,10	ITCH_MOUSE	GO:0006915;apoptosis;GO:0045087;innate immune response;GO:0046642;negative regulation of alpha-beta T cell proliferation;GO:0043066;negative regulation of apoptosis;GO:0050687;negative regulation of defense response to virus;GO:0046329;negative regulation of JNK cascade;GO:0032088;negative regulation of NF-kappaB transcription factor activity;GO:0045732;positive regulation of protein catabolic pr…	GO:0005938;cell cortex;GO:0031410;cytoplasmic vesicle;GO:0005624;membrane fraction;GO:0005634;nucleus;GO:0005886;plasma membrane
TC120858	2.03096e-05	0.235957	BX321211,s,om,10	MEFV_HUMAN	GO:0006954;inflammatory response	GO:0005737;cytoplasm;GO:0005874;microtubule;GO:0005875;microtubule associated complex;GO:0005634;nucleus
TC121175	2.55662e-06	0.275238	CU073186,s,om,10	TLR13_MOUSE	GO:0006954;inflammatory response;GO:0045087;innate immune response	GO:0016021;integral to membrane
TC118607	2.80817e-06	4.47691	CA387236,s,om,10	NM_001124564,1	GO:0006955;immune response	0
TC116979	1.31852e-05	0.283873	CA358411,s,om,10	ICEF1_HUMAN	GO:0006979;response to oxidative stress	GO:0005737;cytoplasm;GO:0005886;plasma membrane
TC121651	5.17375e-05	0.198451	BX870942,s,om,10	IFI44_HUMAN	GO:0009615;response to virus	GO:0005737;cytoplasm
TC127301	0.000601736	3.06144	BX307182,s,om,10	IRF7_MOUSE	GO:0016064;immunoglobulin mediated immune response;GO:0006355;regulation of transcription, DNA-dependent;GO:0009615;response to virus;GO:0045351;type I interferon biosynthetic process	GO:0005737;cytoplasm;GO:0005634;nucleus
TC106122	5.09061e-05	0.14145	CA362588,s,om,10	PERF_MOUSE	GO:0019835;cytolysis;GO:0002357;defense response to tumor cell;GO:0051607;defense response to virus;GO:0002418;immune response to tumor cell;GO:0051260;protein homooligomerization	GO:0044194;cytolytic granule;GO:0016023;cytoplasmic membrane-bounded vesicle;GO:0031904;endosome lumen;GO:0005576;extracellular region;GO:0016021;integral to membrane;GO:0005886;plasma membrane
TC111291	2.96955e-05	3.65998	CA361647,s,om,10	NF2L2_MOUSE	GO:0034599;cellular response to oxidative stress;GO:0030968;endoplasmic reticulum unfolded protein response;GO:0030194;positive regulation of blood coagulation;GO:2000379;positive regulation of reactive oxygen species metabolic process;GO:0045944;positive regulation of transcription from RNA polymerase II promoter;GO:0045995;regulation of embryonic development;GO:2000121;regulation of removal of …	GO:0000785;chromatin;GO:0005829;cytosol;GO:0005634;nucleus
TC122217	0.000630656	0.26317	CA355658,s,om,10	NALP1_HUMAN	GO:0042742;defense response to bacterium;GO:0006917;induction of apoptosis;GO:0051402;neuron apoptosis;GO:0050718;positive regulation of interleukin-1 beta secretion;GO:0032495;response to muramyl dipeptide	GO:0005737;cytoplasm;GO:0072558;NALP1 inflammasome complex;GO:0005634;nucleus
TC130127	1.96571e-06	0.170308	BX080283,s,om,10	RPC4_BOVIN	GO:0045087;innate immune response;GO:0045089;positive regulation of innate immune response;GO:0032728;positive regulation of interferon-beta production;GO:0009615;response to virus;GO:0006383;transcription from RNA polymerase III promoter	GO:0005666;DNA-directed RNA polymerase III complex
TC105279	1.55242e-05	3.20658	CX250847,s,om,10	AGO2_DROME	GO:0051607;defense response to virus;GO:0033227;dsRNA transport;GO:0070868;heterochromatin organization involved in chromatin silencing;GO:0044419;interspecies interaction between organisms;GO:0045071;negative regulation of viral genome replication;GO:0007279;pole cell formation;GO:0030422;production of siRNA involved in RNA interference;GO:0035071;salivary gland cell autophagic cell death;GO:000…	GO:0005737;cytoplasm;GO:0070578;RISC-loading complex;GO:0016442;RNA-induced silencing complex
TC126102	4.58693e-06	0.275246	CA357621,s,om,10	CO3_ONCMY	GO:0006957;complement activation, alternative pathway;GO:0006958;complement activation, classical pathway;GO:0006954;inflammatory response	GO:0005615;extracellular space
TC127101	1.06148e-07	0.124641	CT568671,s,om,10	CO3_ONCMY	GO:0006957;complement activation, alternative pathway;GO:0006958;complement activation, classical pathway;GO:0006954;inflammatory response	GO:0005615;extracellular space
TC127101	1.06148e-07	0.124641	CT568671,s,om,10	CO3_ONCMY	GO:0006957;complement activation, alternative pathway;GO:0006958;complement activation, classical pathway;GO:0006954;inflammatory response	GO:0005615;extracellular space
TC95344	4.8209e-06	3.17003	BX864313,s,om,10	C4BPA_RAT	GO:0006958;complement activation, classical pathway;GO:0045087;innate immune response	GO:0005576;extracellular region
TC95344	4.8209e-06	3.17003	BX864313,s,om,10	C4BPA_RAT	GO:0006958;complement activation, classical pathway;GO:0045087;innate immune response	GO:0005576;extracellular region
TC104464	4.78879e-05	3.39909	AJ620465,s,om,10	CR1_HUMAN	GO:0006958;complement activation, classical pathway;GO:0045087;innate immune response	GO:0005887;integral to plasma membrane
TC114023	0.00169319	0.276406	CA368074,s,om,10	LV107_HUMAN	GO:0006958;complement activation, classical pathway;GO:0045087;innate immune response	GO:0005576;extracellular region
TC101890	0.00422086	0.146008	CA356084,s,om,10	KV404_HUMAN	GO:0006958;complement activation, classical pathway;GO:0045087;innate immune response	GO:0005576;extracellular region
TC126368	0.00169627	0.135583	BX884903,s,om,10	KV404_HUMAN	GO:0006958;complement activation, classical pathway;GO:0045087;innate immune response	GO:0005576;extracellular region
TC112977	0.000151192	0.0712548	CF752225,s,om,10	KV404_HUMAN	GO:0006958;complement activation, classical pathway;GO:0045087;innate immune response	GO:0005576;extracellular region
TC102244	0.00123015	0.135855	CA355553,s,om,10	KV403_HUMAN	GO:0006958;complement activation, classical pathway;GO:0045087;innate immune response	GO:0005576;extracellular region
TC107066	0.000133985	0.118074	CA355553,s,om,10	KV403_HUMAN	GO:0006958;complement activation, classical pathway;GO:0045087;innate immune response	GO:0005576;extracellular region
TC119095	0.000995237	0.284848	CX262267,s,om,10	KV118_HUMAN	GO:0006958;complement activation, classical pathway;GO:0045087;innate immune response	GO:0005576;extracellular region
TC132235	4.41036e-05	3.95145	CA368021,s,om,10	SOCS3_CHICK	GO:0035556;intracellular signal transduction;GO:0040008;regulation of growth	0
